# Supplementary material for: A New Tropical Savanna PFT, Variable Root Growth and Fire Improve Cerrado Vegetation Dynamics Simulations in a Dynamic Global Vegetation Model
Source: Copernicus journal article supplement (doi:10.5194/egusphere-2025-2225), 2025-06-03
Supplement: Supplementary file [file egusphere-2025-2225-RC1-supplement.pdf]

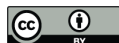

1

2

3

4

5

6 **A New Tropical Savanna PFT, Variable Root Growth and Fire Improve Cerrado**

7 **Vegetation Dynamics Simulations in a Dynamic Global Vegetation Model**

8

9 Jéssica Schüler<sup>1,2\*</sup>, Sarah Bereswill<sup>2\*</sup>, Werner von Bloh<sup>2</sup>,

10 Maik Billing<sup>2</sup>, Boris Sakschewski<sup>2</sup>, Luke Oberhagemann<sup>2,3</sup>, Kirsten Thonicke<sup>2</sup> and

11 Mercedes M.C. Bustamante<sup>1</sup>

12

13 <sup>1</sup> Department of Ecology, University of Brasília, Campus Universitário Darcy Ribeiro,

14 70910-900, Brasília, Brazil

15 <sup>2</sup> Potsdam Institute for Climate Impact Research, Telegrafenberg A 31, 14473 Potsdam,

16 Germany

17 <sup>3</sup> Institute of Environmental Science and Geography, University of Potsdam, Karl-

18 Liebknecht Str. 24/25, Potsdam, Germany

19

20 *Correspondence to:* Jéssica Schüler (jehschuler@gmail.com)

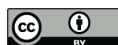

21      **Abstract**

22      The Cerrado, South America's second largest biome, has been historically  
23      underrepresented in Dynamic Global Vegetation Models (DGVMs). Therefore, this study  
24      introduces a novel Plant Functional Type (PFT) tailored to the Cerrado biome into the  
25      DGVM LPJmL-VR-SPITFIRE. The parametrization of the new PFT, called a Tropical  
26      Broadleaved Savanna tree (TrBS), integrates key ecological traits of Cerrado trees,  
27      including specific allometric relationships, wood density, specific leaf area (SLA), deep-  
28      rooting strategies, and fire-adaptive characteristics. The inclusion of TrBS in LPJmL-VR-  
29      SPITFIRE led to notable improvements in simulated vegetation distribution. TrBS became  
30      dominant across Brazil's savanna regions, particularly in the Cerrado and Pantanal. The  
31      model also better reproduced the above- and belowground biomass patterns, accurately  
32      reflecting the "inverted forest" structure of the Cerrado, characterized by a substantial  
33      investment in root systems. Moreover, the presence of TrBS improved the simulation of  
34      fire dynamics, increasing estimates of burned area and yielding seasonal fire patterns more  
35      consistent with observational data. Model validation confirmed the enhanced performance  
36      of the model with the new PFT in capturing vegetation structure and fire regimes in Brazil.  
37      Additionally, a global-scale test demonstrated reasonable alignment between the simulated  
38      and observed global distribution of savannas. In summary, the integration of the TrBS PFT  
39      marks a critical advancement for LPJmL-VR-SPITFIRE, offering a more robust  
40      framework for investigating the interaction of above- with belowground ecological  
41      processes, fire disturbance and the impacts of climate change across the Cerrado and other  
42      tropical savanna ecosystems that together account for approximately 30 % of the primary  
43      production of all terrestrial vegetation.

44

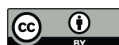

## 1. Introduction

The Cerrado, a biome of global importance and recognized as the world's most biodiverse savanna, faces numerous challenges that threaten its rich biodiversity and the vital ecosystem services it provides (Myers et al., 2000; Sano et al., 2019; Schöler and Bustamante, 2022). The alarming deforestation rates, driven by agricultural expansion, and the impacts of climate change, which are already exacerbating droughts and altering fire dynamics, are the two main drivers of degradation, impacting water availability and vegetation dynamics in this biome (Strassburg et al., 2017; Gomes, et al., 2020a; Rodrigues et al., 2022).

Climate change impacts in Brazil are already evident. A study by INPE to the First Biennial Transparency Report (MCTI, 2024) reveals an increase of approximately 20% in the number of consecutive dry days in Brazil in recent decades, particularly in the North, Northeast, and Central regions of the country. Similarly, Feron et al., (2024) demonstrated an increase in the frequency of compound climate events involving heat, drought, and high fire risk in key regions of South America, including the Amazon. A significant increase in maximum and minimum temperatures was also observed in the Brazilian Cerrado between 1961 and 2019, along with a reduction in relative humidity (Hofmann et al., 2021).

In this context, vegetation modeling emerges as an essential tool for understanding and predicting the Cerrado's responses to these pressures. Dynamic Global Vegetation Models (DGVMs), such as the Lund-Potsdam-Jena managed Land model (LPJmL), aim to simulate changes in vegetation, fire, water and carbon fluxes depending on climate and land use (Cramer et al., 2001; Thonicke et al., 2010; Baudena et al., 2015; Moncrieff et al., 2016; Schaphoff et al., 2018; Drüke et al., 2019; Martens et al., 2021). In order to reduce complexity, common DGVMs classify vegetation into so-called Plant Functional Types (PFTs), which are groups of plants that show similar responses to external drivers and

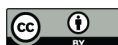

70 resemble their ecological function. PFTs are, in general, distinguished by their allometry,  
71 growth form, phenology and photosynthetic strategy (Wullschleger et al., 2014).  
72 Parameterization of PFTs should therefore capture the most important characteristics of  
73 certain vegetation types while balancing complexity.

74 Specifically in savannas, vegetation is often characterized by small trees and shrubs that  
75 grow deep roots and are well adapted to fire and drought, all of which distinguish them  
76 from the trees in moist and seasonal tropical forests (Ratnam et al., 2011). However, many  
77 DGVMs, including LPJmL, lack a dedicated savanna PFT, leading to significant  
78 inconsistencies in model projections (Foley et al., 1998; Hughes, Valdes and Betts, 2006;  
79 Clark et al., 2011; Neilson, R. P. 2015; Drüke; et al., 2019). This omission often results in  
80 the underestimation of savanna vegetation extent and fire occurrences, while  
81 overestimating above-ground biomass and the extent of tall tropical forest formations, as  
82 demonstrated in simulations for South America (Cramer et al., 2001; Drüke et al., 2019),  
83 or a depiction of savanna vegetation as tropical grasslands which do not encompass the  
84 coexistence of grasses, shrubs and trees. DGVMs are, nevertheless, widely used to  
85 simulate future transitions between the Amazon and the Cerrado biomes, often predicting  
86 an abrupt shift from forest to grassland under climate change (Malhi et al., 2009; Swann  
87 et al., 2015). However, this oversimplification neglects the intricate ecological gradient  
88 that spans diverse vegetation types, from open forests to woody savannas with varying tree  
89 cover densities.

90 This lack of precision in modeling has broader implications for understanding the  
91 Cerrado's role in climate mitigation and adaptation, including nature restoration. For  
92 example, restoring the entire 20 million hectares of the identified priority areas for  
93 restoration in the Cerrado could remove up to 1.77 million tons of carbon from the  
94 atmosphere (Schüler and Bustamante, 2022). Beyond carbon sequestration, savannas play



95 a crucial role in preserving water resources and biodiversity, acting as natural buffers  
96 against climate change and enhancing ecosystem resilience (Oliver et al., 2015; Salazar et  
97 al., 2016; Syktus and McAlpine 2016; Bustamante et al., 2019). With its highly seasonal  
98 climate and diverse mosaic of grasslands, savannas, and forest formations, the Cerrado is  
99 particularly significant for mitigating and adapting to climate change (Ribeiro and Walter  
100 2008; Bustamante et al., 2019; Schüler and Bustamante 2022). Accurately representing  
101 savanna-type vegetation in DGVMs will not only improve projections of the Cerrado's  
102 vulnerability to climate change but also help identify high-risk areas and guide the  
103 development of effective conservation, restoration, and management strategies. For  
104 instance, improved models, acknowledging savanna-specific characteristics, could inform  
105 studies investigating biome transitions and ecological tipping points, fire management  
106 measures, support agricultural adaptation, and optimize water resource management,  
107 ensuring the Cerrado's resilience in the face of environmental challenges.

108 We therefore introduce a new Cerrado specific PFT which we call "Tropical  
109 Broadleaved Savanna tree"  (TrBS) that entails the biome's unique characteristics into a  
110 state-of-the-art version of the LPJmL model (LPJmL-VR-SPITFIRE). LPJmL-VR-  
111 SPITFIRE explicitly simulates variable tree rooting strategies (Sakschewski et al., 2021)  
112 and employs the process-based fire model SPITFIRE (Thonicke et al., 2010;  
113 Oberhagemann et al., 2025), while being based on the latest LPJmL version (LPJmL 5.7;  
114 Wirth et al., 2024). In this study, we test our new approach by modeling the Potential  
115 Natural Vegetation (PNV) distribution for the entire Brazil and validate our results against  
116 observational datasets. This model improvement provides a robust basis for studies  
117 exploring the impact of climate change on vegetation dynamics in the Cerrado region. This  
118 model is expected to show significant improvements in biomass estimate, vegetation type  
119 distributions, and fire dynamics in tropical regions.

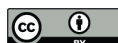

120      **2. Methods**

121      ***2.1 Study region***

122          Our study region encompasses all of the Brazilian territory, focusing on the distribution  
123          of its six biomes, with special attention to the Cerrado biome. Because of its central  
124          position, the Cerrado has ecotones with four of the other five Brazilian biomes: Amazon,  
125          Caatinga, Atlantic Forest and Pantanal (Fig. 1).

126          Brazil spans over 850 million hectares, extending from approximately 5°N to 35°S  
127          (IBGE, 2024). Due to its size, the country encompasses a wide range of climatic  
128          conditions, from subtropical and semi-arid regions to tropical wet environments (Table  
129          S1). The Cerrado, the second-largest vegetation formation in South America, covers about  
130          23% of Brazil (~2 million km<sup>2</sup>), primarily in its central region (IBGE, 2024). Recognized  
131          as both a savanna and a global biodiversity hotspot, its seasonal precipitation regime is  
132          closely tied to the South American Monsoon System (Myers et al., 2000; Grimm, Vera  
133          and Mechoso, 2004). Its climate is predominantly classified as tropical savanna (Aw)  
134          according to the Köppen-Geiger classification system, characterized by a rainy season  
135          from October to April and a dry season from May to September (Peel et al., 2007; Oliveira  
136          et al., 2021). Annual rainfall ranges from 600 mm to 2,000 mm, with the highest averages  
137          near the Amazon border and the lowest near the Caatinga, and the mean annual  
138          temperature is 20.1°C (Sano et al., 2019).

139

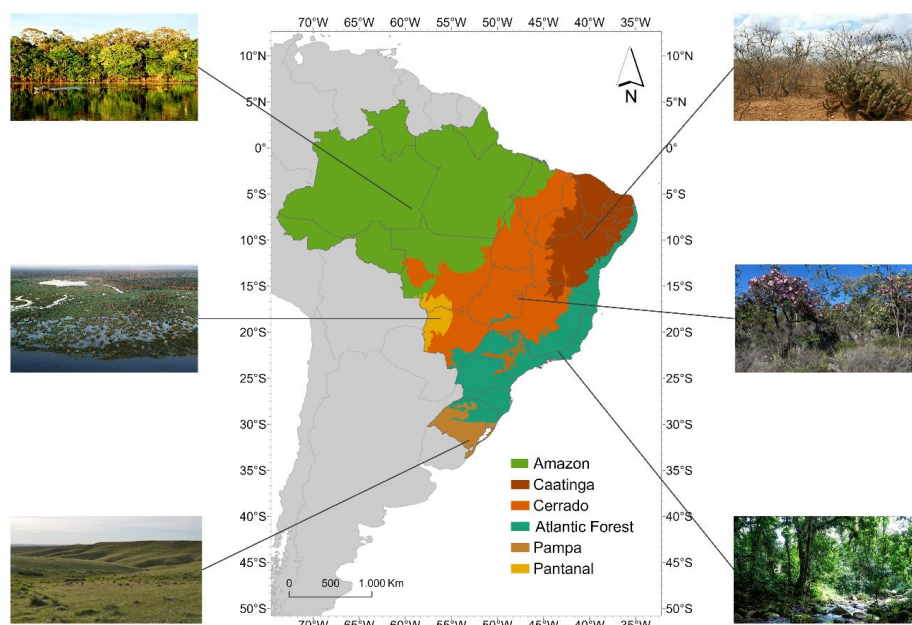

Fig. 1: Map representing the distribution of Brazilian biomes according to IBGE (2024) and photos showing their general appearances. Amazon photo by Andre Deak, Pantanal photo by Leandro de Almeida Luciano, Pampa photo by Ilsi Boldrini, Caatinga photo by Matheus Andrietta, Cerrado photo by Jéssica Schüler, and Atlantic Forest photo by Tânia Rego.

Historically, the biome is subject to periodic fires, especially in the grassland and savanna formations, highly influencing the evolution of its vegetation (Simon et al., 2009; Simon and Pennington 2012). Currently, fires predominantly occur at the end of the dry season, during September and October (Gomes et al., 2020; MapBiomias Fogo 2024). The vegetation in the Cerrado can be classified into three main vegetation formations: Forests, Savannas and Grasslands. Forest formations predominantly consist of trees forming a continuous canopy, typically found on deeper soils (Ribeiro and Walter 2008). Savanna formations are defined by the presence of both arboreal and herbaceous-shrub strata with



a canopy cover ranging from 5% to 70% and tree heights reaching 8 m on average (Ribeiro and Walter 2008). Finally, grassland formations consist of shrubs and sub-shrubs intermixed with herbaceous strata (Ribeiro and Walter 2008).

## 2.2 Model description

The LPJmL-VR-SPITFIRE model is a fire-enabled DGVM that integrates the latest version of the DGVM LPJmL (LPJmL 5.7, Wirth et al., 2024) with the most recent improvements of the SPITFIRE fire regime model (Thonicke et al., 2010; Oberhagemann et al., 2025), together with the variable-roots (VR) developed by Sakschewski et al., (2021). This model framework enables the simulation of global vegetation dynamics, including **fire influence, fire disturbance** (Schaphoff et al., 2018; Drüke et al., 2019).

LPJmL simulates the growth and productivity of both natural and managed vegetation, considering water, carbon, and energy fluxes, and represents vegetation through PFTs (Schaphoff et al., 2018). The model accounts for factors such as climate, soil, water, and nutrient availability to simulate the distribution, biomass, and productivity of PFTs, and has been validated against observational data on productivity, biomass, evapotranspiration and PFT distribution on the global scale (Schaphoff et al., 2018). We briefly outline only the most important features of the LPJmL-VR-SPITFIRE model version, while referring to Schaphoff et al., (2018) for the general LPJmL model description.

*Variable roots:* In the original LPJmL model, a PFT-specific shape parameter  $\beta$  defines tree rooting depth and fine root biomass distribution (Jackson et al., 1996). To better reflect the diversity of rooting strategies of tropical trees, Sakschewski et al., (2021) introduced a range of possible rooting strategies (shallow to deep rooted trees) per PFT, that can coexist or outcompete each other. Unless constrained physically by soil depth or by available resources, actual rooting depth is scaled with tree height via a logistic root growth function,



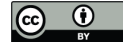

180 and new carbon pools (root sapwood and heartwood) represent the plant's investment in  
181 growing coarse roots (Sakschewski et al., 2021). A long-term selection of the best suited  
182 rooting strategies amongst each PFT is mediated by a modified tree establishment  
183 approach, where the most successful rooting strategies can produce more saplings.

184 *Water-stress mortality*: Tree mortality in LPJmL depends on tree longevity, growth  
185 efficiency and heat stress (Schaphoff et al., 2018). In this study, a new mortality component  
186 reflecting mortality risk due to water stress has been included. This newly integrated water  
187 stress mortality depends on tree phenology (*phen*) (Forkel et al., 2014, applied in  
188 Schaphoff et al., 2018), leaf senescence due to water stress (*phen<sub>water</sub>*) and PFT-specific  
189 parameters representing water stress resistance (*c<sub>res</sub>*) and sensitivity to drought (*c<sub>sens</sub>*).

$$190 \quad mort_{water} = c_{sens} \cdot phen \cdot (1 - phen_{water} - c_{res}) \quad (1)$$

191 *c<sub>sens</sub>* is a PFT-specific parameter that determines the overall sensitivity to drought stress.  
192 *Phen* represents the actual phenological state of a tree, ranging from 0 (no leaf cover) to 1  
193 (full leaf cover). This term accounts for the fact that trees with lower phenology (i.e., more  
194 dormant trees) experience reduced water stress mortality. The expression ( $1 - phen_{water}$ )  
195 represents the intensity of leaf senescence due to low water availability (Forkel et al.,  
196 2014), indicating that periods of reduced water availability lead to higher drought-induced  
197 mortality. *c<sub>res</sub>* defines a threshold below which drought-induced leaf senescence does not  
198 significantly impact tree survival.

199 This model refinement allows for a more accurate representation of PFT-specific  
200 sensitivity to water stress. Coupled with the variable rooting scheme, LPJmL-VR-  
201 SPITFIRE allows trees to optimize the trade-off between carbon investment in deep roots  
202 and aboveground growth, providing a survival advantage under drought conditions. The  
203 PFT-specific parameters are found in Table 1.



204 *SPITFIRE* is a process-based fire model that simulates wildfire occurrence, spread, and  
205 behavior, while considering fuel availability, fuel composition and weather conditions to  
206 simulate ignitions, rate of spread and flame intensity (Thonicke et al., 2010). By coupling  
207 *SPITFIRE* into *LPJmL-VR* (*LPJmL-VR-SPITFIRE*), *SPITFIRE* can simulate the  
208 influence of fire on vegetation dynamics. Vegetation properties simulated by *LPJmL-VR*,  
209 such as PFT composition and litter fuel moisture, determine the simulation of fire spread  
210 and intensity which in turn influence post-fire vegetation conditions. *SPITFIRE* considers  
211 both human-induced and natural ignitions, with the likelihood of these ignitions  
212 developing into fires depending on the fire danger index of the modelled grid cell. Fires  
213 then spread depending on factors such as dead and live fuel composition, wind speed, and  
214 fuel moisture. We adopted the VPD (water vapor pressure deficit)-dependent calculation  
215 of the fire danger index (Drüke et al., 2019; Gomes et al., 2020b) and the most recent  
216 updates to the fire spread functions (Oberhagemann et al., 2025). Both the fire danger  
217 index and rate of spread calculations include PFT-specific parameters that reflect different  
218 vegetation related properties that affect ignition, fire duration and propagation. Fire-related  
219 tree mortality is calculated considering PFT specific bark thickness (influencing cambial  
220 damage) and scorch height (influencing crown mortality). Furthermore, with the recent  
221 updates, *SPITFIRE* allows for multi-day fires and considers moisture of the live grass  
222 share. *SPITFIRE* feeds back to the vegetation components by calculating fire effects on  
223 the vegetation, such as fuel combustion and post-fire tree mortality (Drüke et al., 2019;  
224 Oberhagemann et al., 2025).

225

### 226 ***2.3 Parameterization of a new Savanna tree PFT***

227 The Cerrado trees exhibit considerable morphological and physiological differences  
228 compared to other tropical forest trees growing in closed canopy and wet environments.



Tree functional traits such as allometry, wood density, specific leaf area (SLA), rooting depth, bark thickness, among others, contribute to a distinctive vegetation structure and functioning, which are highly adapted to periodic drought and fire regimes. To incorporate these characteristics into the LPJmL-VR-SPITFIRE model, we used a combination of literature data and field observations to derive and calibrate the relevant parameters for the new Tropical Broadleaved Savanna tree (TrBS) parametrization. A summary of all parameters and data sources used is provided in Table 1 and 2, with detailed explanations below.

### *2.3.1 Allometry and growth form*

The tree allometry is defined through a diameter distribution that follows an asymptotic pattern, where height increases at a slower rate as diameter grows larger, with most trees remaining under 10 meters in height (Fig. S2A and C). A similar trend is observed in the relationship between diameter and crown area: trees initially grow in diameter, subsequently expanding their crown until crown growth reaches a plateau (Fig. S2B and D). This observed growth pattern is implemented by allometric relationships using PFT-specific allometric parameters within the LPJmL model (Schaphoff et al., 2018; Eqn. S1; Eqn. S2). To ensure an accurate representation of TrBS's tree growth, we analyzed field data to estimate maximum height, maximum crown area, and their relationship with stem diameter (Table S2). Using these field measurements, we derived the allometric constant values that best aligned with the observed data, by fitting the allometric equations to the data (Fig. S2). Details about site location, data collected, and their references can be found on Table S2.

Despite variations of wood density and SLA due to factors such as soil quality, temperature, and water availability, trees in more arid environments typically develop denser wood with lower SLA values (indicating thicker leaves), an adaptation to water

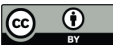

254 scarcity and mechanical stress (Scholz et al., 2008; Terra et al., 2018, Souza et al., 2024).  
255 While we based our wood density value on literature (Souza et al., 2024), the SLA values  
256 used in the development of TrBS PFT were estimated from field data collected from 71  
257 individuals of 26 species (Table 1, Table S2).  
258  
259 Table 1: Allometry, drought mortality and rooting parameters used to define the new  
260 Tropical Broadleaved Savanna Tree (TrBS) PFT, along with the corresponding values for  
261 the Tropical Broadleaved Evergreen Tree (TrBE), and Tropical Broadleaved Raingreen  
262 Tree (TrBR). References cited apply exclusively to TrBS PFT. Details about the field  
263 survey data are available on Table S2. Additional information on TrBE and TrBR  
264 parameters, as well as parameters not included in this table, can be found in Schaphoff et  
265 al., (2018).

| Parameter                                                                     | Tropical<br>Broadleaved<br>Evergreen tree | Tropical<br>Broadleaved<br>Raingreen tree | Tropical<br>Broadleaved<br>Savanna tree | Reference                  |
|-------------------------------------------------------------------------------|-------------------------------------------|-------------------------------------------|-----------------------------------------|----------------------------|
| SLA<br>(mm <sup>2</sup> .mg <sup>-1</sup> )                                   | 9.04                                      | 14.71                                     | 7.36                                    | Field survey<br>(Table S2) |
| Wood density<br>(g.cm <sup>-3</sup> )                                         | 0.44                                      | 0.44                                      | 0.6                                     | Souza et al.,<br>(2024)    |
| Max. height<br>(m)                                                            | 100                                       | 100                                       | 10                                      | Field survey<br>(Table S2) |
| Max.crown<br>area (m <sup>2</sup> )                                           | 25                                        | 15                                        | 10                                      | Field survey<br>(Table S2) |
| Parameter in<br>allometry<br>function ( <i>K</i> -<br><i>allom</i> <i>I</i> ) | 100                                       | 100                                       | 153                                     | Field survey<br>(Table S2) |



| Parameter                                                        | Tropical<br>Broadleaved<br>Evergreen tree                                        | Tropical<br>Broadleaved<br>Raingreen tree | Tropical<br>Broadleaved<br>Savanna tree | Reference                   |
|------------------------------------------------------------------|----------------------------------------------------------------------------------|-------------------------------------------|-----------------------------------------|-----------------------------|
| Parameter in allometry function ( $K_{allom\ 2}$ )               | 40                                                                               | 40                                        | 12                                      | Field survey (Table S2)     |
| Parameter in allometry function ( $K_{allom\ 3}$ )               | 0.67                                                                             | 0.67                                      | 0.52                                    | Field survey (Table S2)     |
| Maximum leaf-to-root-mass-ratio scaling parameter ( $lr_{max}$ ) | 1                                                                                | 1                                         | 0.7                                     |                             |
| Vertical root distribution parameter ( $\beta_{root}$ )          | [0.9418, 0.9851, 0.9925, 0.9950, 0.9963, 0.9971, 0.9976, 0.9981, 0.9986, 0.9993] |                                           |                                         | Sakschewski et al., (2021)  |
| Shape parameter in logistic root growth function ( $k_{root}$ )  | 0.02                                                                             | 0.02                                      | 0.07                                    | Saboya and Borghetti (2012) |

266

### 267 2.3.2 Root growth and belowground carbon allocation

268 Rooting depth is a crucial adaptation for the Cerrado species, enabling access to deep  
 269 water reserves during prolonged dry periods (Oliveira et al., 2005; Tumber-Dávila et al.,  
 270 2022). Due to its high investment in belowground structures, the Cerrado is often referred  
 271 to as an 'upside-down forest,' storing approximately five times more carbon below-ground  
 272 (in roots and as soil carbon) than above-ground (Terra et al., 2023). While deep roots are  
 273 a well-documented feature of the Cerrado plants, rooting strategies vary widely among  
 274 species. To try to reflect this diversity in rooting strategies in LPJmL-VR-SPITFIRE we  
 275 allowed for 10 different root distributions ( $\beta_{root}$  parameter) per PFT. We chose the same  
 276 range of  $\beta_{root}$  values for TrBS PFT as for the other PFTs, to allow a spectrum of shallow,



intermediate and deep rooting strategies to compete. From  $\beta_{root}$  the depth where 95% of root biomass are found (D95) can be calculated (see Sakschewski et al., 2021). Studies show that the Cerrado tree seedlings invest more in root growth compared to shoot growth as a strategy to access water deeper in soil during the dry season (Hoffmann, Orthen and Franco 2004; Saboya and Borghetti 2012). We reflect this by modifying the shape parameter of the logistic root growth function ( $k_{root}$ , Table 1), to allow TrBS to reach deeper rooting depths **already** earlier in their lifecycle (Fig. 2), enhancing the underground competitiveness of these savanna trees. In LPJmL-VR-SPITFIRE, carbon allocation to coarse woody roots is represented by separate root sapwood and heartwood carbon pools, introduced in addition to the fine root carbon pool (Sakschewski et al., 2021). Due to the necessary balance between root and stem sapwood investment (Pipe Model approach; Shinosaki et al., 1964), and the relationship between tree height and rooting depth, deep root growth for TrBS saplings represents a trade-off between above- and belowground growth.

The ratio between the leaf and the fine root biomass in the model depends on the model internally calculated water stress index ( $\omega$ ), where more root biomass is built under water stress, and is constrained by the  $lr_{max}$  (maximum leaf-to-root-mass-ratio) scaling parameter (Table 1; Schaphoff et al., 2018). We set  $lr_{max}$  to 0.7 to allow TrBS to invest relatively more into root biomass than the other tropical tree PFTs, where  $lr_{max}$  was set to 1 (Schaphoff et al., 2018).

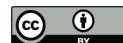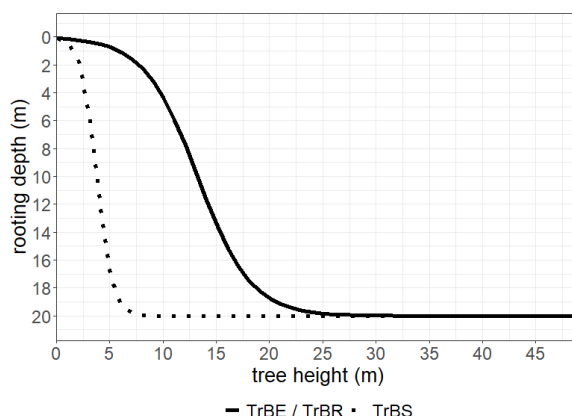

Fig. 2: Logistic growth function scaling rooting depth to tree height, shown for a soil depth of 20m for the different PFTs (TrBE = tropical broadleaved evergreen, TrBR = tropical broadleaved raingreen, TrBS = Tropical Broadleaved Savanna).

### 2.3.2 Phenology

The Cerrado exhibits pronounced precipitation seasonality, which shapes the phenology of its vegetation. Deciduous and semi-deciduous species display leaf dynamics in which leaves shed during the dry season, peaking in July, and sprout during the transition to the rainy season in September (de Camargo et al., 2018). Despite the dominance of deciduous and semi-deciduous species (74%), the community rarely experiences complete defoliation, retaining at least half of its foliage in most years (de Camargo et al., 2018). This seasonal pattern is also evident in the Leaf Area Index (LAI) of trees. LAI values drop from around 1 in the rainy season to approximately 0.6 on the peak of the dry season (Hoffmann et al., 2005).

The degree of foliation in LPJmL-VR-SPITFIRE is given by the phenology status, which is updated daily (ranging from 0 = no leaves to 1 = full leaf cover) and derived by multiplication of four limiting functions, namely a water-limiting ( $f_{water}$ ), light-limiting ( $f_{light}$ ), cold-limiting ( $f_{cold}$ ) and heat-limiting ( $f_{heat}$ ) function (Schaphoff et al., 2018;



317 Forkel et al., 2014). The shape parameters of  $f_{water}$  were chosen to reflect a behaviour  
318 intermediate between the evergreen and the raingreen PFT (Fig. S3), and thereby reflects  
319 the general phenological behaviour of the Cerrado community as explained above;  $f_{heat}$ ,  
320  $f_{cold}$  and  $f_{light}$  were set to the same values as for TrBE.

#### 321 2.3.4 Fire dynamic and vegetation adaptation

322 Approximately 6 million hectares burned in the Cerrado in 2023 (MapBiomass Fogo  
323 2024), with 98% of these fires attributed to human activity (Schumacher et al., 2022). At  
324 local and landscape scales, fire dynamics are influenced by factors such as fuel availability,  
325 ignition sources, topography, and climatic conditions (Gomes, Miranda, and Bustamante  
326 2018). In the Cerrado, fire behavior is closely tied to seasonal cycles and one key factor  
327 determining its behavior is the vapor pressure deficit (VPD) (Gomes, et al., 2020b; Oliveira  
328 et al., 2021). VPD is the measure of the difference between the vapour pressure of the  
329 moisture present in the air and the maximum vapour pressure the air can hold, being  
330 influenced by temperature and relative humidity. In the Cerrado, the VPD varies  
331 seasonally, with average values around 0.3 to 0.7 kPa in the rainy season and 1.4 to 2.0  
332 kPa in the dry season (Cattelan et al., 2024). Higher VPD dehydrates plant biomass,  
333 especially from grasses, making it more flammable and susceptible to fire (Gomes, et al.,  
334 2020b). The VPD affects the rate of spread and intensity of the fire, with higher VPD  
335 resulting in faster and more intense fires in a given fuel bed (Gomes et al., 2020b; Oliveira  
336 et al., 2021). In LPJmL-VR-SPITFIRE, the fire danger index depends on VPD and is  
337 scaled via a PFT-specific factor  $\alpha_{VPD}$ , where higher values of  $\alpha_{VPD}$  increase fire danger.  
338 We calibrated  $\alpha_{VPD}$  to achieve good agreement between observed and modelled burnt  
339 area. A higher  $\alpha_{VPD}$  for TrBS than for TrBE and TrBR was chosen, because the fuel  
340 produced by the Cerrado trees burns more readily, compared to the fuel dropped by trees  
341 in the moist forests (dos Santos et al., 2018).





Because of its fire-prone environment, the Cerrado trees exhibit several adaptations that enable them to survive fire damage. These include belowground organs that promote resprouting after fire, thick bark that insulates and protects internal tissues, robust terminal branches, leaves concentrated at branch tips, and persistent stipules that safeguard apical buds, all minimize fire damage (Simon et al., 2009; Simon and Pennington 2012). Fire-induced tree mortality in LPJmL-VR-SPITFIRE results from combined effects of cambial and crown damage (Oberhagemann et al., 2025). PFT-specific parameters for bark thickness were chosen to fit the relationship between stem diameter and bark thickness shown in Hofmann et al., (2009) (Fig. S3; Table 2). Scorch height, the highest point at which flames reach and affect the vegetation, is calculated from fire intensity and a PFT specific scaling factor ( $F$ ; see Eqn. S5), which also depends on tree crown length relative to its height (Thonicke et al., 2010; Oberhagemann et al., 2025). The Cerrado trees have relatively long crowns compared to their total height, with a ratio of 0.53 (Table 2). While this exposes them to crown scorch, the above-mentioned adaptations result in an overall lower mortality risk from crown scorch, and we therefore adjusted the parameter  $F$  accordingly (Table 2).

Table 2: Fire parameters used to define the new Tropical Broadleaved Savanna Tree (TrBS) PFT, along with the corresponding values for the Tropical Broadleaved Evergreen Tree (TrBE) and Tropical Broadleaved Raingreen Tree (TrBR) PFTs. References cited apply exclusively to TrBS PFT. SPITFIRE parameters for TrBE and TrBR are taken from (1) Thonicke et al., (2010), and (2) Drüke et al., (2019).



| Parameter                                                       | Tropical<br>Broadleaved<br>Evergreen tree | Tropical<br>Broadleaved<br>Raingreen tree | Tropical<br>Broadleaved<br>Savanna tree | Reference                                                |
|-----------------------------------------------------------------|-------------------------------------------|-------------------------------------------|-----------------------------------------|----------------------------------------------------------|
| Leaf<br>Longevity<br>( <i>years</i> )                           | 1.6                                       | 0.5                                       | 1                                       | Cianciaruso et<br>al., (2013);<br>Souza, J. P.<br>(2012) |
| Sensitivity<br>to drought<br>( <i>C<sub>sens</sub></i> )        | 100                                       | 100                                       | 10                                      |                                                          |
| Water<br>stress<br>resistance<br>( <i>C<sub>res</sub></i> )     | 0.1                                       | 0.1                                       | 0.1                                     |                                                          |
| Water<br>limitation<br>factor<br>( <i>wscal<sub>min</sub></i> ) | 0                                         | 0.35                                      | 0                                       |                                                          |
| $\alpha$ VPD                                                    | 6                                         | 6                                         | 10                                      |                                                          |
| Crown<br>length<br>parameter                                    | 0.3334 <sup>(1)</sup>                     | 0.10 <sup>(1)</sup>                       | 0.53                                    | Field survey<br>(Table S2)                               |
| Scorch<br>height<br>parameter<br>( <i>F</i> )                   | 0.193 <sup>(2)</sup>                      | 0.0799 <sup>(2)</sup>                     | 0.13                                    |                                                          |
| Bark<br>thickness<br>par1/par2                                  | 0.0301/0.0281 <sup>(1)</sup>              | 0.1085/0.212 <sup>(1)</sup>               | 0.135/0.2820                            | Hoffmann et<br>al., (2009)                               |

366

#### 367 **2.4 Simulation protocol**

368 To evaluate the performance of the newly implemented TrBS PFT, two simulation runs  
 369 were conducted: one including TrBS PFT (hereafter ‘Savanna’ simulation) and the other  
 370 experiment excluding it (hereafter ‘No Savanna’ simulation). Both simulations covered



371 the period from 1901 to 2019, with a 5000-year spin-up phase, and utilized identical  
372 environmental input data in a 0.5° horizontal resolution.

373 The model spin-up was simulated from bare ground using climate input from 1901-  
374 1930 (with pre-industrial pCO<sub>2</sub> = 276.59 ppm), which was repeated for 5000 years, to  
375 allow carbon pools to reach equilibrium with climate. The transient simulation then ran  
376 from 1901 to 2019. For model validation, we analyzed the last 30 years of the transient  
377 run. Because we aim to evaluate the establishment and general characteristics of the new  
378 TrBS PFT, all simulations were conducted for potential natural vegetation (PNV) only,  
379 with no simulation of human land use to focus on geographical distribution of vegetation  
380 and fire. While LPJmL-VR-SPITFIRE features the latest model updates regarding the  
381 nitrogen cycle (Bloh et al., 2018) and biological nitrogen fixation (Wirth et al., 2024), we  
382 switched the nitrogen limitation off as it was beyond the scope for this study.

383 The LPJmL-VR-SPITFIRE model uses daily climate input, including air temperature,  
384 precipitation, wind speed, humidity, and long- and shortwave radiation. These datasets  
385 were sourced from ISIMIP3a (<https://data.isimip.org/10.48364/ISIMIP.664235.2>), which  
386 combines GSWP3 data (1901–1978) and W5E5 data (1979–2019). Atmospheric CO<sub>2</sub>  
387 concentration data were derived from the TRENDY project (Friedlingstein et al., 2023).

388 Soil texture data were obtained from the Harmonized World Soil Database  
389 (Nachtergaele et al., 2009). Soil depth in LPJmL-VR-SPITFIRE was defined using the  
390 lower water table depth values provided by the SOIL-WATERGRIDS dataset (Guglielmo  
391 et al., 2021).

392 Ignition sources for the SPITFIRE model are based on population density (Klein  
393 Goldewijk et al., 2011) for human ignitions, and lightning occurrence data from the  
394 OTL/LIS dataset (Christian et al., 2003) for natural ignitions.

395



396      **2.5 Model validation**

397            For each of our simulation outputs, we selected appropriate Brazilian or global datasets  
398            to validate the modeled results from LPJmL-VR-SPITFIRE. All spatial analysis and  
399            comparisons between the validation data and model outputs were conducted in R, utilizing  
400            the ncdf4, terra, raster and sf packages. The analysis focused on the mean values of the last  
401            30 years of the simulations (1990-2019). Details of each validation dataset are provided  
402            below.

403      *2.5.1 Vegetation distribution*

404            To validate the modeled distribution of the vegetation in Brazil, represented by the  
405            foliar projected coverage (FPC) of each PFT, we used Brazil's original vegetation  
406            distribution by IBGE (2017). The original IBGE map was a very detailed Shapefile, with  
407            specific variation of each major vegetation group, that would have complicated the  
408            comparison with the FPC and limited number of PFTs. For this reason, we aggregated the  
409            vegetation classes into 13 vegetation types following the attribute table of IBGE's product  
410            (Fig. 4). After that, we converted the Shapefile into a raster file using the function rasterize  
411            from the terra package in R.

412            To evaluate the distribution of the new TrBS PFT, as well as the other tropical PFTs,  
413            we overlaid the FPC output with the corresponding classification from IBGE. For this  
414            comparison, we selected only grid cells where the respective  $FPC \geq 0.3$  and matched the  
415            class in the IBGE dataset, generating a map that identifies under-, over-, and correctly  
416            simulated PFT coverage.



### 2.5.2 Above- and belowground Biomass, evapotranspiration and productivity

The above- and belowground biomass (AGB and BGB) validation maps were produced by the team from the Fourth National Communication to the United Nations Convention of Climate Change, here referred to as QCN (MCTI 2020). These maps were produced considering the distribution of Brazil's original vegetation (IBGE 2017) and estimating AGB and BGB using specific equations and field data that best fit each vegetation type. From these maps we derived a BGB:AGB ratio map to validate the structural characteristics of TrBS PFT. For better comparison, we calculated the Spearman Correlation between the two modeled scenarios of BGB:AGB and the QCN validation using the stats package from R software.

For evapotranspiration (ET) and gross primary productivity (GPP), the mean annual distribution of the last 30 simulation years (1990-2019) were compared to reference datasets (GPP: Carvalhais et al., 2014; ET: ERA-Interim-Land, Balsamo et al., 2015) and evaluated via the Normalized Mean Squared Error (NMSE) and Pearson correlation (as described in Sakschewski et al., 2021).

### 2.5.3 Burned Area

The Burned Area validation map was produced using the annual burned coverage product from [MapBiomass Fogo 3.0 \(2023\)](#) database. This product gives a 30 m resolution presence-absence map of areas in which fire occurred for a time series from 1985 to 2023. The burned area was calculated from the burned coverage for a 0.5° grid, covering all the Brazilian territory, for each year from [1990 to 2018](#). Then, from resulting annual burned area maps, we calculated the mean burned area for all selected time series. All calculations



439 and map generation from the MapBiomass dataset were performed using the Google Earth  
440 Engine platform.

441 For the spatial distribution of annual burned area, we created a map of the human land-  
442 use fraction based on MapBiomass 9.0 land-use data (MapBiomass, 2023), using the mean  
443 value from 1990 to 2019 (Fig. S5). Since our simulation considers only potential natural  
444 vegetation (PNV), we weighed the burned area, in both the validation data and model  
445 output, to account for fire occurrences in human-managed land.

446 The validation of the monthly burned area for the Cerrado biome was conducted using  
447 the MapBiomass Fogo 3.0 dataset (2023). The burned area validation was also weighed by  
448 the natural land-cover of the corresponding year. This dataset was used to assess the  
449 accuracy of the simulated seasonal burned area patterns in the Cerrado. The comparison  
450 between the simulated scenarios and the MapBiomass data was evaluated using Normalized  
451 Mean Squared Error (NMSE), Willmott's index,  $R^2$ , and p-value statistics from the  
452 respective R packages kerntools, hydroGOF and stats (Drüke et al., 2019).

453 For carbon emission by fire (FireC), our validation is based on the Global Fire  
454 Emissions Database (GFED4), which derives its fireC emission maps using its own burned  
455 area data (van der Werf et al., 2017). GFED4 combines satellite observations of burned  
456 area with biogeochemical modeling to estimate emissions of  $\text{CO}_2$ , CO,  $\text{CH}_4$ , and other  
457 trace gases. Given the strong link between burned area and fire emissions, we apply the  
458 same land-use fraction weighting approach as for burned area to ensure consistency in our  
459 analysis.



**3. Results**

**3.1 Vegetation distribution**

The inclusion of TrBS PFT has significantly altered the distribution and abundance of key vegetation types across Brazil, particularly the Tropical C<sub>4</sub> grasses and TrBE PFTs. In simulations without TrBS, C<sub>4</sub> grass dominates across northeastern and central Brazil, occupying the whole Caatinga biome, most of the Cerrado and northern Atlantic Forest (Fig. 3).

TrBS establishes itself predominantly in the Cerrado and Pantanal biomes, aligning with regions classified as savanna vegetation by IBGE (Figs. 3 and 4). Pockets of TrBS also appear in northern portions of the Amazon biome, where patches of savanna-like vegetation can occur, and Atlantic Forest regions where seasonal forest is present (Fig. 3 and 4). The presence of TrBS results in a contraction of C<sub>4</sub> grass, which retreats mostly to the Caatinga biome, where they almost entirely dominate due to Caatinga’s dry environment, while grass and savanna vegetation coexist in Pantanal, northern and eastern Cerrado (Fig. 3).

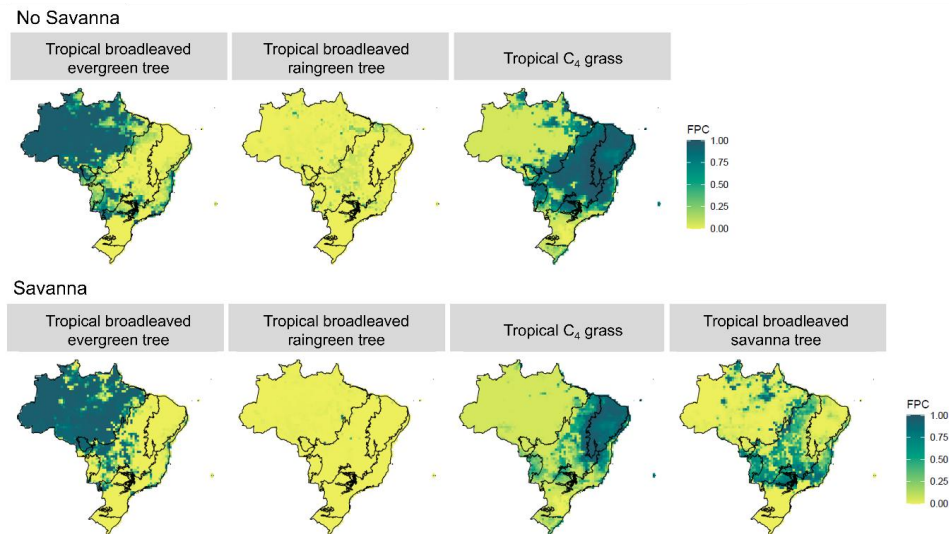



Fig. 3: Foliar Projected Cover (FPC) of the Plant Functional Types (PFT) for Tropical Broadleaved Evergreen Tree, Tropical Broadleaved Raingreen Tree, Tropical C<sub>4</sub> Grass and Tropical Broadleaved Savanna Tree in Brazil under two model configurations: ‘No Savanna’ and ‘Savanna’.

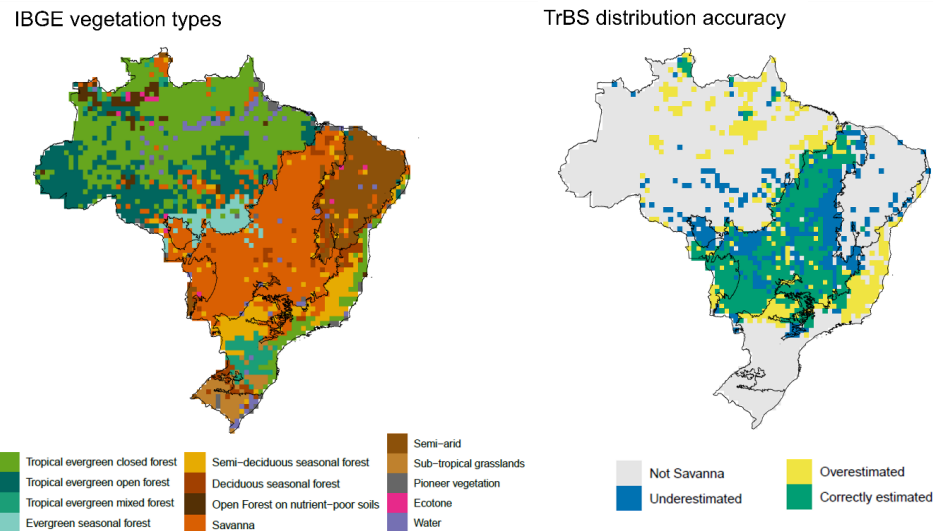

Fig. 4: Maps showing the Brazilian vegetation types according to IBGE (left) and TrBS PFT distribution accuracy (right) in comparison with the savanna vegetation class from IBGE. A threshold of 30% FPC cover was used to determine distribution accuracy.

### 3.2 Above- and belowground Biomass and vegetation structure

The inclusion of TrBS PFT significantly improved the simulated above- and belowground biomass patterns across Brazil compared to simulations without it. By better capturing the characteristic small trees with extensive belowground structures of the Cerrado, TrBS PFT led to an improved representation of the ‘upside-down forest’ in central Brazil (Fig. 5). As a reflection of the distinct allocation strategies of the Cerrado





493 vegetation, the biomass ratio (BGB:AGB) was also clearly improved in the Savanna  
494 scenario (Fig. 5). Although the simulated values did not fully match those observed in the  
495 QCN validation, as shown by the Spearman correlations (QCN vs. Savanna: 0.27; QCN  
496 vs. No Savanna: -0.16), the introduction of TrBS resulted in a more accurate simulation of  
497 carbon allocation across Brazil. Normalized Mean Error (NME) and correlation of  
498 modelled ET and GPP across Brazil were in a similar range for both simulations in  
499 comparison to the reference data (Fig. S9; Table S3).

500 TrBS PFT also improved the representation of tree height gradients, with tall trees,  
501 above 20 m, in the Amazon transitioning to slightly shorter trees in the southern Amazon  
502 and reaching approximately 7 m in the Cerrado (Fig. 5; Fig. S7). Additionally, the model  
503 now captures a gradient in rooting depth (D95), with shallower roots in the Amazon,  
504 deepening towards the southern Amazon and Cerrado (Fig. 5; Fig. S7). This pattern is  
505 further supported by a higher D95:height ratio in the Cerrado, aligning with the  
506 characterization of its vegetation as an 'upside-down forest,' where rooting depth can  
507 exceed tree height.

508

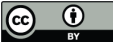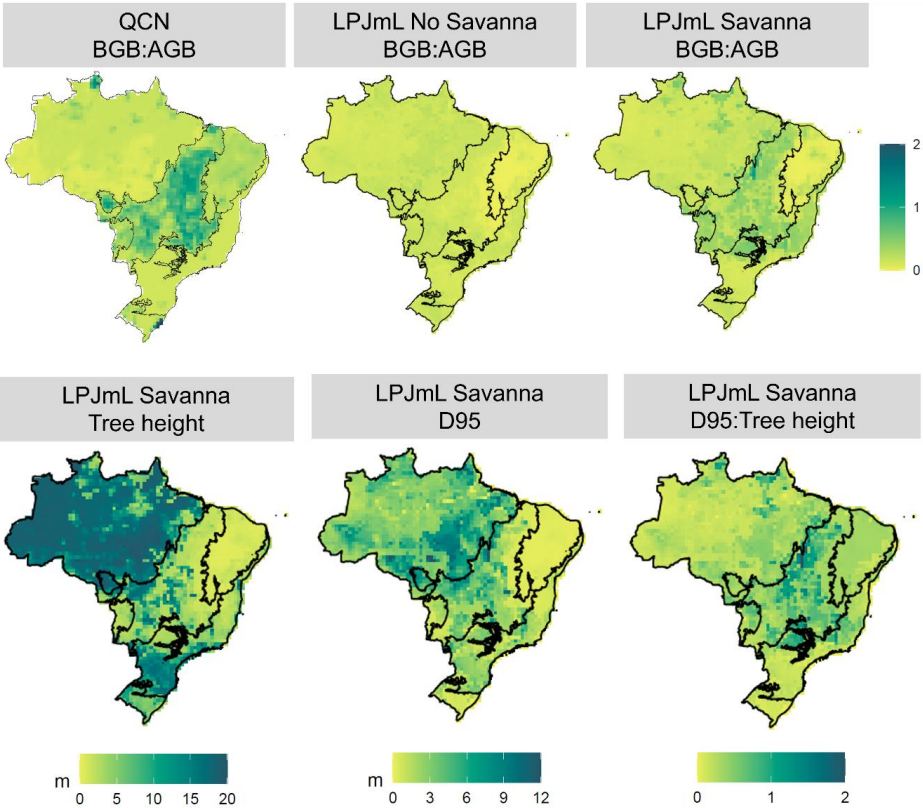

Fig. 5: FPC-weighted BGB:AGB below- and aboveground biomass ratio (BGB:AGB) from LPJmL simulations and QCN validation product (top row), and FPC-weighted tree height and D95, and their ratio (D95:Tree height) from LPJmL ‘Savanna’ simulation (bottom row).

### 3.3 Fire dynamics

The introduction of TrBS PFT significantly influenced burned area patterns across biomes. LPJmL-VR-SPITFIRE generally underestimated burned areas in the ‘No Savanna’ simulation, particularly in the Cerrado and Amazon regions, while overestimating them in the Caatinga (Table 3; Fig. 6). With the inclusion of the new TrBS PFT, the burned area estimates in the Cerrado increased, surpassing the values recorded in

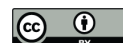

the MapBiomias Fogo in the central Cerrado, but still underestimating burned area in the northern region (Fig. 6). In contrast, the Amazon continued to show underestimations of burned areas, likely due to the general assumption of higher human-caused ignitions in rural areas not capturing the real motivations to set fire. Despite these regional discrepancies and given the SPITFIRE improvements applied to both model configurations, the inclusion of TrBS PFT and its adjusted parameterisations led to a clear improvement in the total burned area estimates for Brazil (Table 3).

528

Table 3: Total burned area for all Brazilian biomes simulated by LPJmL-VR-SPITFIRE for ‘Savanna’, and ‘No Savanna’ scenarios, and the validation data from MapBiomias Fogo. The values are in Thousand hectares (Kha).

|                 | <b>Savanna (Kha)</b> | <b>No Savanna (Kha)</b> | <b>MapBiomias (Kha)</b> |
|-----------------|----------------------|-------------------------|-------------------------|
| Cerrado         | 6660.7               | 2597.21                 | 7748.43                 |
| Amazon          | 405.67               | 44.48                   | 4991.57                 |
| Atlantic Forest | 89.69                | 5.82                    | 130.83                  |
| Caatinga        | 2937.68              | 2818.43                 | 345.6                   |
| Pantanal        | 203.84               | 5.33                    | 558.55                  |
| Pampa           | 1.15                 | 1.15                    | 11.89                   |
| <b>Brazil</b>   | <b>10298.73</b>      | <b>5472.42</b>          | <b>13786.89</b>         |

532

533

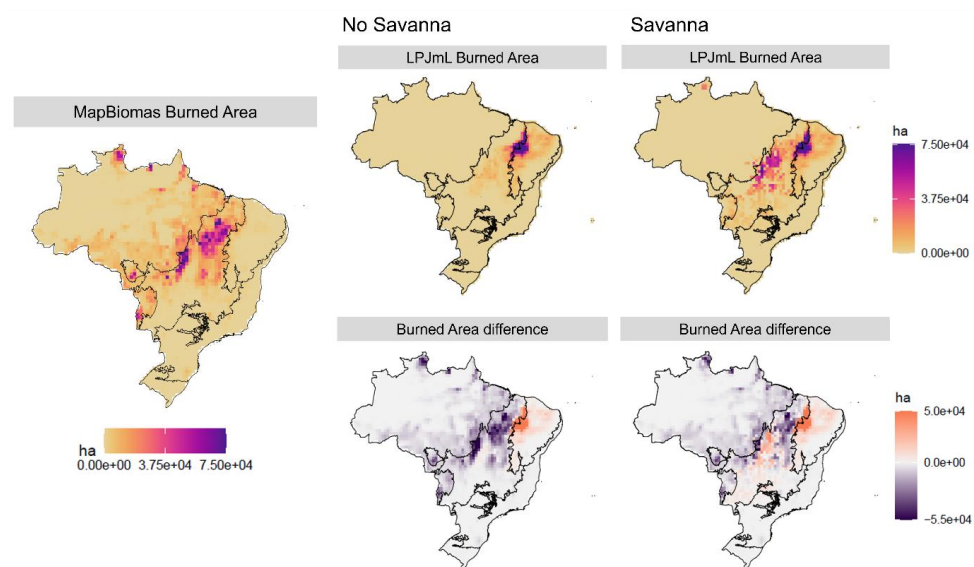

Fig. 6: LPJmL simulations of burned area in Brazil for ‘No Savanna’ and ‘Savanna’ scenarios (top row), the validation data by MapBiomass Fogo (left), and the respective difference between simulated results and MapBiomass Fogo validation (bottom row).

We could also observe an improvement in the seasonal patterns of the burned area in the Cerrado Biome with the incorporation of TrBS PFT (Fig. 7). The Savanna scenario, compared to the MapBiomass data, shows an NMSE of 0.39 with an  $R^2$  of 0.45, and a Willmott index of 0.81, indicating that the model has a good fit. The No Savanna scenario has a slightly higher NMSE (0.83) and Willmott index (0.86), and a lower  $R^2$  (0.40) compared to MapBiomass, suggesting that removing TrBS reduces the overall model’s ability to represent observed seasonal fire patterns.

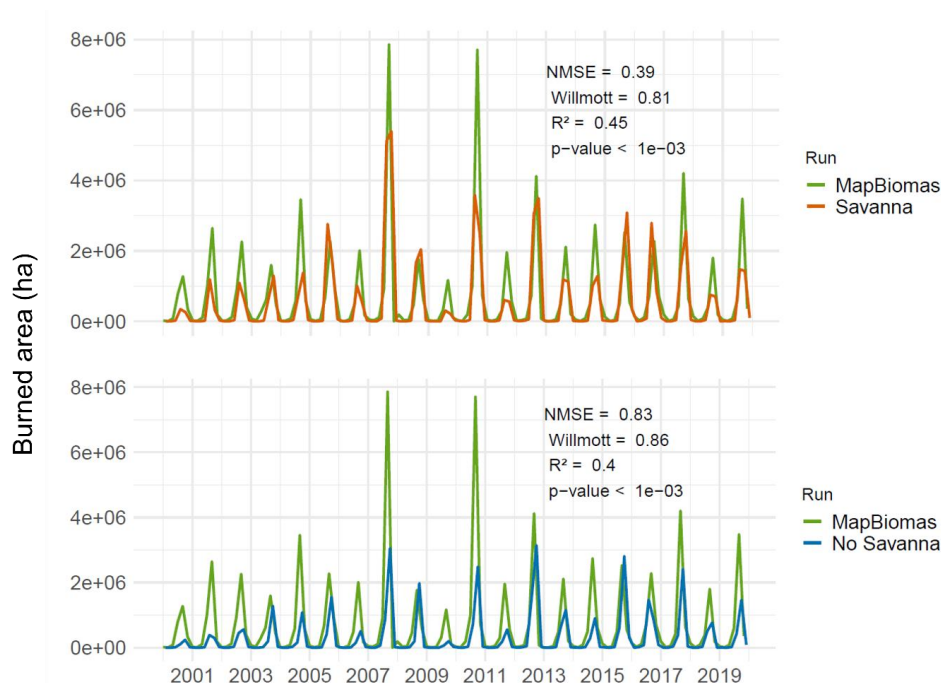

Fig. 7: Total monthly burned area, for the Cerrado Biome, from 2000 to 2019 for two LPJmL simulation scenarios: 'Savanna' (top) and 'No Savanna' (bottom) in comparison with the monthly burned area product from MapBiomass Fogo.

Carbon emission by fire (FireC) patterns reflect directly the burned area patterns (Fig. 8). Overall, the introduction of TrBS did not improve emission estimates in Brazil as most of the emission comes from southeastern Amazon, which has its burned area highly underestimated by our model. Fire-related emissions in the Cerrado, on the other hand, were overestimated in the Savanna scenario, especially in the central portion of the biome, which is linked to the spatial burned area patterns.

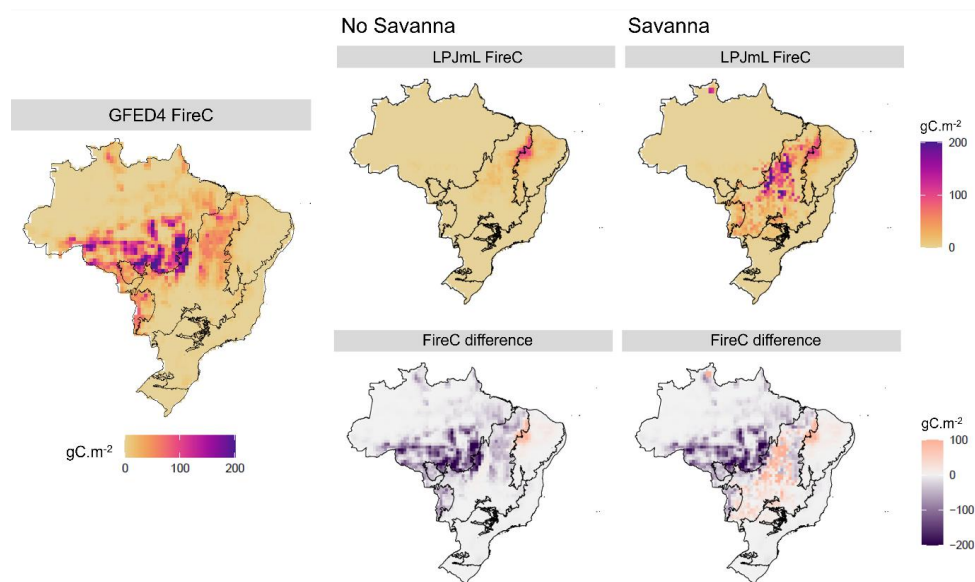

Fig. 8: LPJmL simulations of Fire carbon emission in Brazil for No Savanna and Savanna scenarios (top row), the validation data by GFED4 (left), and the respective difference between simulated results and GFED4 validation (bottom row).

### 3.4 Extrapolation to the global scale

Since the LPJmL-VR-SPITFIRE model will also be run on a global scale in future applications, the parameterization of the new PFT was tested in a global simulation using the same climate input data set as for the Brazilian simulations. Although TrBS PFT was specifically adapted to the Cerrado tree data, we found high agreement in the simulated global savanna distribution compared to a reference dataset (Hengl et al., 2018). The results are shown in Supplementary Fig. S8.



## 4. Discussion

### *4.1 Advancing in Savanna Modeling*

The introduction of a savanna-specific Plant Functional Type in the LPJmL-VR-SPITFIRE model significantly enhances the representation of vegetation and fire dynamics in Brazil. TrBS improved simulations of carbon allocation, particularly below- to aboveground biomass ratio, and better represented fire behavior, namely the spatial distribution and temporal dynamics of burned area. Key features of the Cerrado, that also apply to tropical savannas in general, are now well represented: a vegetation that is adapted to seasonal drought environments by accessing water with deep root systems and allocating more resources belowground and can cope with or even depends on regular occurring fires. This update moves the capability of LPJmL-VR-SPITFIRE beyond the previous binary classification of tropical rainforests and grasslands, allowing for a more nuanced depiction of ecological transitions, such as the Amazon-Cerrado interface. By incorporating savanna vegetation, the model facilitates more realistic investigations into the future dynamics of these biomes and allows for a more critical evaluation of restoration efforts within this specific vegetation type. A model limited to representing only 'forest' and 'grasslands' will fail to capture the significance and vulnerabilities inherent in savanna ecosystems like the Cerrado.

Other DGVMs have struggled earlier to accurately depict the savanna biome (Whitley et al., 2017; Baudena et al., 2015), as many of them oversimplify root dynamics, specific phenology and vegetation-fire feedback. In particular, the role of rooting depth, which is often constrained to shallow values in DGVMs, has a significant impact on the competition between forest, savanna vegetation and grasses, as shown by Langan et al., (2017) for South America. The introduction of root growth and rooting depth diversity in the LPJmL model (Sakschewski et al., 2021) can therefore be considered key to improving savanna



597 modeling, as it allows vegetation adaptation to water scarcity, especially when subdividing  
598 the PFTs into different rooting strategies. Importantly, the competition for water between  
599 savanna trees and grasses can also be better depicted when partitioning of access to water  
600 resources is considered (Whitley et al., 2017; Baudena et al., 2015).

601 The SPITFIRE model provided a process-based calculation of ignition, fire spread and  
602 tree fire mortality that is central to better reproduce typical Cerrado and savanna biome  
603 characteristics. However, the often-extensive use of fire for land management purposes in  
604 savannas (and, for example, also the edges of Amazonia) is not explicitly reflected in  
605 SPITFIRE, as the model only considers a function of population density to calculate  
606 ignition risks. Recent attempts to better reflect anthropogenic fire management (Perkins et  
607 al., 2024) could help further improve Cerrado fire modeling. Given the increasing pressure  
608 on the Cerrado and already observed shifts in fire regimes (da Silva Arruda et al., 2024),  
609 this is key to enabling simulations of future trajectories in the region. While accurate fire-  
610 vegetation dynamics are crucial for realistic biome distribution simulations, they are  
611 insufficient if key vegetation characteristics, such as deep root water uptake, are not  
612 adequately represented (D'Onofrio et al., 2020, Baudena et al., 2015).

613 We parameterized the savanna tree PFT using field and literature data specific to the  
614 Brazilian Cerrado region and achieved a good fit between modelled and observed savanna  
615 distribution. Other modeling studies, for example Moncrieff et al., (2016), have  
616 encountered challenges to capture the Cerrado extent due to missing processes.  
617 Extrapolations of model parametrization that were specifically evaluated for one savanna  
618 region, here the Cerrado, often leads to inaccuracies, given the distinct climate, species  
619 composition, and fire-vegetation interactions in each of the savanna-type regions (Solbrig  
620 et al., 1996; Lehmann et al., 2014; Moncrieff et al., 2016). Nevertheless, to assess the  
621 robustness of our parameterization, we conducted a global simulation and found that the





parameterization developed for the Brazilian savanna performed well in simulating global tropical savanna distributions (Fig. S7). Future work could also include an assessment to better capture main functional differences between each savanna-type region.

#### 4.2 Challenges in Representing the Cerrado Dynamics

Despite these advancements, several challenges remain in capturing the complex vegetation dynamics of the Cerrado. Although our simulations already produce a mix of savanna trees and grasses in the northern Cerrado, one key issue is achieving a realistic balance and dynamic feedback between tree and grass cover. Achieving a more realistic vegetation structure is challenging with representing tree and shrub individuals as generalized representatives of each PFT, even though differentiations by rooting depth were incorporated in LPJmL-VR-SPITFIRE. Building on the knowledge gained in this study a gap-model framework that simulates individual trees and also incorporates trait diversity such as the LPJmL-FIT model (Sakschewski et al., 2015; Thonicke et al., 2020), could offer a more accurate representation of tree-grass coexistence in the near future.

Our analysis focused on depicting the overall distribution and performance of the new savanna PFT across Brazil. A detailed, site specific validation of carbon and water fluxes, the seasonality of leaf cover and productivity might complement the results of this study. In this context, further model refinement could be undertaken, such as implementing shade intolerant PFTs in the model (Ronquim et al., 2003; Lemos-Filho et al., 2010). Additionally, a notable limitation observed in our simulations is the overrepresentation of C<sub>4</sub> grasses in the Caatinga biome, which contrasts with the known vegetation characteristics of the region. The Caatinga is a semi-arid biome characterized by diverse vegetation physiognomies, including succulents and small shrub vegetation, with a predominance of seasonal dry tropical forests rather than extensive grasslands (de Queiroz



et al., 2017). In follow-up work with LPJmL-VR-SPITFIRE, it should be determined which PFT combination is closest to this complex real-world vegetation. As discussed for the tree-grass coexistence in the previous paragraph, Caatinga vegetation modeling would benefit from an individual tree approach (as in LPJmL-FIT) rather than the average individual approach of the LPJmL model. Addressing this will be important for improving model realism and its applicability to drier tropical ecosystems, as well as enhancing its performance in representing fire patterns in the region.

Fire impacts on the vegetation are a key process that maintains savannas' open-canopy structure. Our parameterization of the savanna tree PFT resulted in a vegetation type that is readily **burning**, while being well protected against lethal damage from fire. However, resprouting mechanisms, which are crucial for post-fire recovery (Souchie et al. 2017) are not yet implemented explicitly in the vegetation model but would improve the simulation of vegetation recovery. **The amount of fuel available for burning is another key area of ongoing model development, as it strongly influences fire spread and intensity. In the most recent SPITFIRE version that we used in this study, the live grass moisture calculation was substantially improved (Oberhagemann et al., 2025), better reflecting seasonal dynamics of fuel availability of grass vegetation. However, currently live woody materials are not parametrized as part of the burnable matter in SPITFIRE, but this is potentially important in Cerrado (Oliveira et al., 2021).**

**In Savannas**, there is often extensive use of fire for land management purposes. Specifically, in the Cerrado, fire in natural areas is associated with the use of fire for deforestation, with fire escaping to natural areas and also with pasture management; in areas of mechanized agriculture and planted forests, owners rather protect the areas against fire. The underestimation in burned area observed in southeastern Amazon is also a product of such land-use change practices, especially the usage of fire to manage large extension



672 of pasturelands in Amazon (MapBiomass Fogo, 2024) which could possibly escape and  
673 damage adjacent tropical rainforest (Cano-Crespo et al., 2015). The SPITFIRE model does  
674 not explicitly account for different fire management regimes but scales ignitions to human  
675 population density. This might explain the lack of fire at the edges of Amazonia in our  
676 simulations and also complicates validation of burned area and fire carbon emissions from  
677 our PNV simulations. We therefore weighed both validation data and model output by the  
678 human landuse fraction from MapBiomass to exclude grid cells with extensive human land  
679 use from the analysis.

680 The most recent version of LPJmL incorporates the nitrogen cycle (von Bloh et al.,  
681 2018), along with mechanisms of biological nitrogen fixation (BNF, Wirth et al., 2024).  
682 Soils in the Cerrado are characterized by acidity, high aluminum concentrations, and  
683 nutrient scarcity (Bustamante et al., 2006; 2012), requiring vegetation to develop specific  
684 adaptations that confer a competitive advantage in these nutrient-poor conditions. Future  
685 advancements should leverage these model enhancements to incorporate nitrogen and  
686 other nutrient constraints, enhancing ecological realism to specifically address this aspect  
687 to the complex ecological interactions.

688 Beyond the factors already discussed, rootable soil depth significantly influences  
689 vegetation dynamics. However, determining the maximum depth roots can physically  
690 penetrate is challenging, as they can grow into bedrock and access groundwater, but are  
691 also limited by high soil density and low oxygen availability. In our simulations we used  
692 the water table depth of Guigle et al., (2021) as a proxy for rootable soil depth, which  
693 allows deep rooting over large parts of the Cerrado, in line with observations of deep  
694 rooting vegetation. While this method provides reasonably spatial variable maximum  
695 rooting depths, LPJmL-VR-SPITFIRE does not simulate an actual water table. In reality,  
696 deep-rooted trees can tap groundwater, but LPJmL-VR-SPITFIRE assumes free drainage,



697 preventing this interaction. Consequently, some areas may experience artificially shallow  
698 rooting depths (e.g. Amazonian floodplains) without the benefit of accessing deeper water  
699 reserves, a factor that could become important, especially when running future simulations  
700 with the model. Considering these aspects in future work, especially global studies, could  
701 further improve the representation of belowground competition and resulting spatial  
702 vegetation distribution.

703

## 704 **5. Conclusion**

705 The parameterization of the new Tropical Broadleaved Savanna PFT (TrBS) in LPJmL-  
706 VR-SPITFIRE significantly improves the representation of the Cerrado biome, the second-  
707 largest vegetation formation in South America, in terms of belowground vs aboveground  
708 competition, vegetation dynamics and fire. By inclusion of variable rooting strategies  
709 along with recent process-based fire modeling, and a new drought mortality function, we  
710 present a model that is suited to study complex ecological interactions of the sensitive  
711 Cerrado biome that are rapidly changing under ongoing climate change. Here, we  
712 combined literature and observational data to parameterize the TrBS PFT and to adjust  
713 parameters of tree and root allocation functions, among others. Introducing a dedicated  
714 vegetation type for tropical savannas and combining with variable rooting strategies will  
715 equip DGVMs to make more precise assessments of recovery, reforestation, and  
716 regeneration strategies in these unique ecosystems. By refining the modeling of savanna  
717 dynamics, this study provides a valuable foundation for improving conservation strategies,  
718 land-use planning, and climate mitigation efforts in fire-prone landscapes such as the  
719 Cerrado. The introduction of a savanna-specific PFT with deeper rooting depth not only  
720 led to a more realistic allocation of carbon belowground but also enabled the model to  
721 reproduce the iconic “upside-down forest” structure of the Cerrado. This structural realism



also translated into better representation of vegetation distribution, fire regimes, and their seasonal patterns. These results underscore the importance of incorporating trait diversity, particularly rooting strategies, into DGVMs. Building on this progress, future work, such as extending this savanna-specific PFT to individual-based models like LPJmL-FIT, can further enhance our understanding of post-fire recovery dynamics interacting with functional diversity and more clearly distinguish the intrinsic ecological behavior of tropical savannas from that of tropical forests.

## 6. Code and Data Availability

The LPJmL-VR-SPITFIRE model is open-source and available at [\[link will be added in future\]](#). Field survey data used in this study are available from the corresponding author upon reasonable request. All other relevant data supporting the findings of this study are available from the authors or included in the supplementary materials.

## 7. Competing interests

One author is a member of the editorial board of journal "Biogeosciences".

## 8. Author contributions

\*J.S.: Data curation, Formal analysis, Visualization, Writing – original draft

\*S.B.: Methodology and Software, Formal analysis, Visualization, Writing – original draft

W.v.B.: Methodology and Software, Writing – review and editing

M.Bi.: Methodology and Software, Writing – review and editing

B.S.: Conceptualization, Writing – review and editing

L.O.: Writing – review and editing



747 K.Th.: Supervision, Writing – review and editing

748 M.Bu.: Supervision, Writing – review and editing

749

## 750 **9. Acknowledgments**

751 The authors are grateful to PIK and the Graduate Program in Ecology from UnB for  
752 providing the infrastructure and assistance without which this project wouldn't be possible.

753 To all researchers from the Ecosystems in Transition group at PIK and the Ecosystems  
754 Ecology Lab at UnB that contributed with suggestions, critiques, points and ideas. Special  
755 thanks to Letícia Gomes, Isabel Castro, Waira Machida, Lucas Costa and Felipe Lenti for  
756 sharing their field data, essential for this work. Boris Sakschewski is part of the Planetary  
757 Boundaries Science Lab.

758

## 759 **10. Funding Information**

760 J.S. acknowledges the funding by the National Coordination for High Level Education and  
761 Training (CAPES) through the Internationalization Program (PrInt), grant number  
762 88887.891863/2023-00. This work was supported by the National Institute of Science and  
763 Technology for Climate Change Phase 2 under CNPq grant 465501/2014-1, FAPESP grant  
764 2014/50848-9 and CAPES grant 88881.146050/2017-01. S.B. gratefully acknowledges  
765 funding by the Conservation International Foundation, grant number CI-114129. This  
766 project has received funding from the European Union's Horizon 2020 research and  
767 innovation program under grant agreement No 101003890 (FirEURisk). The authors  
768 gratefully acknowledge the Ministry of Research, Science and Culture (MWFK) of Land  
769 Brandenburg for supporting this project by providing resources on the high-performance  
770 computer system at the Potsdam Institute for Climate Impact Research.

771

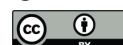

772     **11. References**

- 773     Balsamo, G., Albergel, C., Beljaars, A., Boussetta, S., Brun, E., Cloke, H., Dee, D., Dutra,  
774         E., Muñoz-Sabater, J., Pappenberger, F., de Rosnay, P., Stockdale, T., and Vitart, F.:  
775         ERA-Interim/Land: A global land surface reanalysis data set, *Hydrol. Earth. Syst. Sc.*,  
776         19, 389–407, <https://doi.org/10.5194/hess-19-389-2015>, 2015.
- 777     Baudena, M., Dekker, S. C., Van Bodegom, P. M., Cuesta, B., Higgins, S. I., Lehsten, V.,  
778         Reick, C. H., Rietkerk, M., Scheiter, S., Yin, Z., Zavala, M. A., and Brovkin, V.: Forests,  
779         savannas, and grasslands: Bridging the knowledge gap between ecology and Dynamic  
780         Global Vegetation Models, *Biogeosciences*, 12, 1833–1848, [https://doi.org/10.5194/bg-](https://doi.org/10.5194/bg-12-1833-2015)  
781         [12-1833-2015](https://doi.org/10.5194/bg-12-1833-2015), 2015.
- 782     Bowman, D. M. J. S., Balch, J. K., Artaxo, P., Bond, W. J., Carlson, J. M., Cochrane, M.  
783         A., D’Antonio, C. M., DeFries, R. S., Doyle, J. C., Harrison, S. P., Johnston, F. H.,  
784         Keeley, J. E., Krawchuk, M. A., Kull, C. A., Marston, J. B., Moritz, M. A., Prentice, I.  
785         C., Roos, C. I., Scott, A. C., ... Pyne, S. J: Fire in the Earth System, *Science*, 324, 481–  
786         484, <https://doi.org/10.1126/science.1163886>, 2009.
- 787     Bustamante, M. M. C., Nardoto, G. B., Pinto, A. S., Resende, J. C. F., Takahashi, F. S. C.,  
788         and Vieira, L. C. G.: Potential impacts of climate change on biogeochemical functioning  
789         of Cerrado ecosystems. *Braz. J. Biol.*, 72, 655–671, [https://doi.org/10.1590/S1519-](https://doi.org/10.1590/S1519-69842012000400005)  
790         [69842012000400005](https://doi.org/10.1590/S1519-69842012000400005), 2012.
- 791     Bustamante, M. M. C., Silva, J. S., Scariot, A., Sampaio, A. B., Mascia, D. L., Garcia, E.,  
792         Sano, E., Fernandes, G. W., Durigan, G., Roitman, I., Figueiredo, I., Rodrigues, R. R.,  
793         Pillar, V. D., de Oliveira, A. O., Malhado, A. C., Alencar, A., Vendramini, A., Padovezi,  
794         A., Carrascosa, H., ... Nobre, C.: Ecological restoration as a strategy for mitigating and  
795         adapting to climate change: Lessons and challenges from Brazil. *Mitig. Adapt. Stra.t Gl.*,  
796         24, 1249–1270, <https://doi.org/10.1007/s11027-018-9837-5>, 2019.
- 797     Bustamante, M., Medina, E., Asner, G., Nardoto, G., and Garcia-Montiel, D.: Nitrogen  
798         cycling in tropical and temperate savannas, *Biogeochemistry*, 79, 209–237,  
799         <https://doi.org/10.1007/s10533-006-9006-x>, 2006.



- 800 Cano-Crespo, A., Oliveira, P. J. C., Boit, A., Cardoso, M., and Thonicke, K.: Forest edge  
801 burning in the Brazilian Amazon promoted by escaping fires from managed pastures, J.  
802 Geophys. Res-Bioge., 120, 2095–2107, <https://doi.org/10.1002/2015JG002914>, 2015.
- 803 Carvalhais, N., Forkel, M., Khomik, M., Bellarby, J., Jung, M., Migliavacca, M., Mu, M.,  
804 Saatchi, S., Santoro, M., Thurner, M., Weber, U., Ahrens, B., Beer, C., Cescatti, A.,  
805 Randerson, J. T., and Reichstein, M.: Global covariation of carbon turnover times with  
806 climate in terrestrial ecosystems, Nature, 51, 213–217,  
807 <https://doi.org/10.1038/nature13731>, 2014.
- 808 Christian, H. J., Blakeslee, R. J., Boccippio, D. J., Boeck, W. L., Buechler, D. E., Driscoll,  
809 K. T., Goodman, S. J., Hall, J. M., Koshak, W. J., Mach, D. M., and Stewart, M. F.:  
810 Global frequency and distribution of lightning as observed from space by the Optical  
811 Transient Detector, J. Geophys. Res-Atmos, 108, ACL 4-1-ACL 4-15,  
812 <https://doi.org/10.1029/2002JD002347>, 2003.
- 813 Costa, L.: Nutrient enrichment changes water transport structures of savanna woody plants,  
814 figshare, <https://doi.org/10.6084/m9.figshare.13252052.v1>, 2020.
- 815 Cramer, W., Bondeau, A., Woodward, F. I., Prentice, I. C., Betts, R. A., Brovkin, V., Cox,  
816 P. M., Fisher, V., Foley, J. A., Friend, A. D., Kucharik, C., Lomas, M. R., Ramankutty,  
817 N., Sitch, S., Smith, B., White, A., and Young-Molling, C.: Global response of terrestrial  
818 ecosystem structure and function to CO<sub>2</sub> and climate change: Results from six dynamic  
819 global vegetation models, Glob. Change Biol., 7, 357–373,  
820 <https://doi.org/10.1046/j.1365-2486.2001.00383.x>, 2001.
- 821 de Camargo, M. G. G., de Carvalho, G. H., Alberton, B. D. C., Reys, P., and Morellato, L.  
822 P. C.: Leafing patterns and leaf exchange strategies of a cerrado woody community.  
823 Biotropica, 50, 442–454. <https://doi.org/10.1111/btp.12552>, 2018.
- 824 D’Onofrio, D., Baudena, M., Lasslop, G., Nieradzik, L. P., Wårlind, D., and von  
825 Hardenberg, J.: Linking vegetation-climate-fire relationships in Sub-Saharan Africa to  
826 key ecological processes in two dynamic global vegetation models, Fr. Environ. Sci, 8,  
827 <https://doi.org/10.3389/fenvs.2020.00136>, 2020.





- 828 de Queiroz, L.P., Cardoso, D., Fernandes, M.F., Moro, M.F: Diversity and Evolution of  
829 Flowering Plants of the Caatinga Domain., In: Silva, J.M.C., Leal, I.R., Tabarelli, M.  
830 (eds) Caatinga. Springer-Cham, [https://doi.org/10.1007/978-3-319-68339-3\\_2](https://doi.org/10.1007/978-3-319-68339-3_2), 2017.
- 831 Drüke, M., Forkel, M., von Bloh, W., Sakschewski, B., Cardoso, M., Bustamante, M.,  
832 Kurths, J., and Thonicke, K.: Improving the LPJmL4-SPITFIRE vegetation–fire model  
833 for South America using satellite data, *Geosci. Model Dev.*, 12, 5029–5054,  
834 <https://doi.org/10.5194/gmd-12-5029-2019>, 2019.
- 835 Feron, S., Cordero, R. R., Damiani, A., MacDonell, S., Pizarro, J., Goubanova, K.,  
836 Valenzuela, R., Wang, C., Rester, L., and Beaulieu, A.: South America is becoming  
837 warmer, drier, and more flammable. *Commun. Earth Environ.*, 5, 501,  
838 <https://doi.org/10.1038/s43247-024-01654-7>, 2024.
- 839 Forkel, M., Carvalhais, N., Schaphoff, S., V. Bloh, W., Migliavacca, M., Thurner, M., and  
840 Thonicke, K.: Identifying environmental controls on vegetation greenness phenology  
841 through model–data integration. *Biogeosciences*, 11, 7025–7050.  
842 <https://doi.org/10.5194/bg-11-7025-2014>, 2014.
- 843 Gomes, L., Miranda, H. S., and Bustamante, M. M. C.: How can we advance the knowledge  
844 on the behavior and effects of fire in the Cerrado biome? *Forest Ecol. Manag.*, 417, 281–  
845 290. <https://doi.org/10.1016/j.foreco.2018.02.032>, 2018.
- 846 Gomes, L., Miranda, H. S., Soares-Filho, B., Rodrigues, L., Oliveira, U., and Bustamante,  
847 M. M. C.: Responses of plant biomass in the Brazilian savanna to frequent fires, *Front.*  
848 *Forest Glob. Change*, 3, 507710. <https://doi.org/10.3389/ffgc.2020.507710>, 2020a.
- 849 Gomes, L., Miranda, H. S., Silvério, D. V., and Bustamante, M. M. C.: Effects and  
850 behaviour of experimental fires in grasslands, savannas, and forests of the Brazilian  
851 Cerrado, *Forest Ecol. Manag.*, 458, 117804.  
852 <https://doi.org/10.1016/j.foreco.2019.117804>, 2020b.
- 853 Gomes, L., Schüller, J., Silva, C., Alencar, A., Zimbres, B., Arruda, V., Silva, W. V. da,  
854 Souza, E., Shimbo, J., Marimon, B. S., Lenza, E., Fagg, C. W., Miranda, S., Morandi, P.  
855 S., Marimon-Junior, B. H., and Bustamante, M.: Impacts of fire frequency on net CO<sub>2</sub>



- 856 emissions in the Cerrado savanna vegetation, *Fire*, 7, 208,  
857 <https://doi.org/10.3390/fire7080280>, 2024.
- 858 Grimm, A. M., Vera, C. S., and Mechoso, C. R.: The South American monsoon system,  
859 In: *The Global Monsoon System: Research and Forecast*, WMO/TD 1266, TMRP  
860 Rep. 70, 219–238, Available at <https://core.ac.uk/download/pdf/36730348.pdf>, 2005.
- 861 Guglielmo, M., Tang, F. H. M., Pasut, C., and Maggi, F.: SOIL-WATERGRIDS,  
862 mapping dynamic changes in soil moisture and depth of water table from 1970 to  
863 2014, *Scient. Data*, 8, 263. <https://doi.org/10.1038/s41597-021-01032-4>, 2021.
- 864 Hengl, T., Walsh, M. G., Sanderman, J., Wheeler, I., Harrison, S. P., and Prentice, I. C.:  
865 Global mapping of potential natural vegetation: An assessment of machine learning  
866 algorithms for estimating land potential, *PeerJ*, 6, e5457,  
867 <https://doi.org/10.7717/peerj.5457>, 2018.
- 868 Hoffmann, W. A., Adasme, R., Haridasan, M., T. De Carvalho, M., Geiger, E. L., Pereira,  
869 M. A. B., Gotsch, S. G., and Franco, A. C.: Tree topkill, not mortality, governs the  
870 dynamics of savanna–forest boundaries under frequent fire in central Brazil, *Ecology*,  
871 90, 1326–1337, <https://doi.org/10.1890/08-0741.1>, 2009.
- 872 Hoffmann, W. A., da Silva, E. R., Machado, G. C., Bucci, S. J., Scholz, F. G., Goldstein,  
873 G., and Meinzer, F. C.: Seasonal leaf dynamics across a tree density gradient in a  
874 Brazilian savanna, *Oecologia*, 145, 306–315, [https://doi.org/10.1007/s00442-005-0129-](https://doi.org/10.1007/s00442-005-0129-x)  
875 [x](https://doi.org/10.1007/s00442-005-0129-x), 2005.
- 876 Hoffmann, W. A., Orthen, B., and Franco, A. C.: Constraints to seedling success of savanna  
877 and forest trees across the savanna-forest boundary, *Oecologia*, 140, 252–260,  
878 <https://doi.org/10.1007/s00442-004-1595-2>, 2004.
- 879 Hofmann, G., Cardoso, M., Alves, R., Weber, E., Barbosa, A., De Toledo, P., Pontual, F.,  
880 Salles, L., Hasenack, H., Passos Cordeiro, J. L., Aquino, F., and Oliveira, L.: The  
881 Brazilian Cerrado is becoming hotter and drier, *Glob. Change Biol.*, 27,  
882 <https://doi.org/10.1111/gcb.15712>, 2021.



- 883 IBGE: Brazilian Vegetation, Available at  
884 [https://www.ibge.gov.br/en/geosciences/maps/state-maps/19470-brazilian-](https://www.ibge.gov.br/en/geosciences/maps/state-maps/19470-brazilian-vegetation.html?and=downloads)  
885 [vegetation.html?and=downloads](https://www.ibge.gov.br/en/geosciences/maps/state-maps/19470-brazilian-vegetation.html?and=downloads), 2017.
- 886 IBGE: Biomas e Sistema Costeiro-Marinho do Brasil—PGI, Available at  
887 <https://www.ibge.gov.br/apps/biomas/#/home>, 2024.
- 888 Jackson, R. B., Canadell, J., Ehleringer, J. R., Mooney, H. A., Sala, O. E., and Schulze, E.  
889 D.: A global analysis of root distributions for terrestrial biomes, *Oecologia*, 108, 389–  
890 411. <https://doi.org/10.1007/BF00333714>, 1996.
- 891 Klein Goldewijk, K., Beusen, A., Dreht, G., and Vos, M.: The HYDE 3.1 spatially explicit  
892 database of human-induced global land-use change over the past 12,000 years, *Global*  
893 *Ecol Biogeogr.*, 20, 73–86, <https://doi.org/10.1111/j.1466-8238.2010.00587.x>, 2011.
- 894 Langan, L., Higgins, S. I., and Scheiter, S.: Climate-biomes, pedo-biomes or pyro-biomes:  
895 which world view explains the tropical forest–savanna boundary in South America? *J.*  
896 *Biogeogr.*, 44, 2319–2330, <https://doi.org/10.1111/jbi.13018>, 2017.
- 897 Lehmann, C. E. R., Anderson, T. M., Sankaran, M., Higgins, S. I., Archibald, S., Hoffmann,  
898 W. A., Hanan, N. P., Williams, R. J., Fensham, R. J., Felfili, J., Hutley, L. B., Ratnam,  
899 J., San Jose, J., Montes, R., Franklin, D., Russell-Smith, J., Ryan, C. M., Durigan, G.,  
900 Hiernaux, P., ... Bond, W. J.: Savanna vegetation-fire-climate relationships differ among  
901 continents. *Science*, 343, 548–552, <https://doi.org/10.1126/science.1247355>, 2014.
- 902 Machida, W. S., Gomes, L., Moser, P., Castro, I. B., Miranda, S. C., da Silva-Júnior, M.  
903 C., and Bustamante, M. M. C.: Long term post-fire recovery of woody plants in  
904 savannas of central Brazil, *Forest Ecol. Manag.*, 493, 119255.  
905 <https://doi.org/10.1016/j.foreco.2021.119255>, 2021.
- 906 Malhi, Y., Aragão, L. E. O. C., Galbraith, D., Huntingford, C., Fisher, R., Zelazowski, P.,  
907 Sitch, S., McSweeney, C., and Meir, P.: Exploring the likelihood and mechanism of a  
908 climate-change-induced dieback of the Amazon rainforest, *P. Natl. A. Sci.*, 106, 20610–  
909 20615, <https://doi.org/10.1073/pnas.0804619106>, 2009.
- 910 MapBiomas 9.0: MapBiomas Uso e Cobertura 9.0, Available at  
911 <https://brasil.mapbiomas.org/colecoes-mapbiomas/>, 2024.



- 912 MapBiomass Fogo: MapBiomass Fogo 3.0, Available at  
913 <https://mapbiomassfogocol3v1.netlify.app/index.html>, 2024.
- 914 Martens, C., Hickler, T., Davis-Reddy, C., Engelbrecht, F., Higgins, S. I., Von Maltitz, G.  
915 P., Midgley, G. F., Pfeiffer, M., and Scheiter, S.: Large uncertainties in future biome  
916 changes in Africa call for flexible climate adaptation strategies, *Glob. Change Biol.*, 27,  
917 340–358 <https://doi.org/10.1111/gcb.15390>, 2021.
- 918 MCTI: Quarto inventário nacional de emissões e remoções antrópicas de gases de efeito  
919 estufa setor uso da terra, mudança do uso da terra e florestas, Available at:  
920 <https://repositorio.mcti.gov.br/handle/mctic/4782>, 2020.
- 921 MCTI: First biennial transparency report of Brazil to the United Nations Framework  
922 Convention on Climate Change, Available at: [https://www.gov.br/mcti/pt-](https://www.gov.br/mcti/pt-br/acompanhe-o-mcti/sirene/publicacoes/relatorios-bienais-de-transparencia-btrs)  
923 [br/acompanhe-o-mcti/sirene/publicacoes/relatorios-bienais-de-transparencia-btrs](https://www.gov.br/mcti/pt-br/acompanhe-o-mcti/sirene/publicacoes/relatorios-bienais-de-transparencia-btrs), 2024.
- 924 Moncrieff, G. R., Scheiter, S., Langan, L., Trabucco, A., and Higgins, S. I.: The future  
925 distribution of the savannah biome: model-based and biogeographic contingency, *Philos.*  
926 *T. R. Soc. B.*, 371, 20150311, <https://doi.org/10.1098/rstb.2015.0311>, 2016.
- 927 Myers, N., Mittermeier, R. A., Mittermeier, C. G., da Fonseca, G. A. B., and Kent, J.:  
928 Biodiversity hotspots for conservation priorities, *Nature*, 403, 853–858.  
929 <https://doi.org/10.1038/35002501>, 2000.
- 930 Oberhagemann, L., Billing, M., Von Bloh, W., Drüke, M., Forrest, M., Bowring, S. P. K.,  
931 Hetzer, J., Ribalaygua Batalla, J., and Thonicke, K.: Sources of uncertainty in the global  
932 fire model SPITFIRE: development of LPJmL-SPITFIRE1.9 and directions for future  
933 improvements, *Geosci. Model Dev.*, 18, 2021–2025, [https://doi.org/10.5194/gmd-18-](https://doi.org/10.5194/gmd-18-2021-2025)  
934 [2021-2025](https://doi.org/10.5194/gmd-18-2021-2025), 2025.
- 935 Oliveira, R. S., Bezerra, L., Davidson, E. A., Pinto, F., Klink, C. A., Nepstad, D. C., and  
936 Moreira, A.: Deep root function in soil water dynamics in cerrado savannas of central  
937 Brazil. *Funct. Ecol.*, 19, 574–581, <https://doi.org/10.1111/j.1365-2435.2005.01003.x>,  
938 2005.
- 939 Oliveira, U., Soares-Filho, B., de Souza Costa, W. L., Gomes, L., Bustamante, M., and  
940 Miranda, H.: Modeling fuel loads dynamics and fire spread probability in the Brazilian



- 941 Cerrado, Forest Ecol. Manag., 482, 118889,  
942 <https://doi.org/10.1016/j.foreco.2020.118889>, 2021.
- 943 Oliver, T. H., Heard, M. S., Isaac, N. J. B., Roy, D. B., Procter, D., Eigenbrod, F.,  
944 Freckleton, R., Hector, A., Orme, C. D. L., Petchey, O. L., Proença, V., Raffaelli, D.,  
945 Suttle, K. B., Mace, G. M., Martín-López, B., Woodcock, B. A., and Bullock, J. M:  
946 Biodiversity and resilience of ecosystem functions. Trends Ecol. Evol., 30, 673–684,  
947 <https://doi.org/10.1016/j.tree.2015.08.009>, 2015.
- 948 Peel, M. C., Finlayson, B. L., and McMahon, T. A.: Updated world map of the Köppen-  
949 Geiger climate classification, Hydrol. Earth Syst. Sc., 11, 1633–1644,  
950 <https://doi.org/10.5194/hess-11-1633-2007>, 2007.
- 951 Perkins, O., Kasoar, M., Voulgarakis, A., Smith, C., Mistry, J., and Millington, J. D. A.  
952 (2024). A global behavioural model of human fire use and management: WHAM! v1.0,  
953 Geosci. Model Dev., 17, 3993–4016, <https://doi.org/10.5194/gmd-17-3993-2024>, 2024.
- 954 Pivello, V. R.: The Use of fire in the Cerrado and amazonian rainforests of Brazil: past and  
955 present. Fire Ecol., 7, 24–39. <https://doi.org/10.4996/fireecology.0701024>, 2011.
- 956 Ratnam, J., Bond, W. J., Fensham, R. J., Hoffmann, W. A., Archibald, S., Lehmann, C. E.  
957 R., Anderson, M. T., Higgins, S. I., and Sankaran, M.: When is a ‘forest’ a savanna, and  
958 why does it matter? Global Ecol. Biogeogr., 20, 653–660. [https://doi.org/10.1111/j.1466-](https://doi.org/10.1111/j.1466-8238.2010.00634.x)  
959 [8238.2010.00634.x](https://doi.org/10.1111/j.1466-8238.2010.00634.x), 2011.
- 960 Ribeiro, J., and Walter, B.: As principais fitofisionomias do bioma Cerrado In: Sano, S.M.,  
961 Almeida, S.P. and Ribeiro, J.F. (Eds.), Cerrado Ecologia e Flora, p. 152–212., 2008.
- 962 Rodrigues, A. A., Macedo, M. N., Silvério, D. V., Maracahipes, L., Coe, M. T., Brando, P.  
963 M., Shimbo, J. Z., Rajão, R., Soares-Filho, B., and Bustamante, M. M. C.: Cerrado  
964 deforestation threatens regional climate and water availability for agriculture and  
965 ecosystems, Glob. Change Biol., 28, 6807–6822, <https://doi.org/10.1111/gcb.16386>,  
966 2022.
- 967 Ronquim, C. C., Prado, C. H. B. de A., and de Paula, N. F.: Growth and photosynthetic  
968 capacity in two woody species of cerrado vegetation under different radiation



- 969 availability, *Braz. Arch. Biol. Techn.*, 46, 243–252, <https://doi.org/10.1590/S1516->  
970 [89132003000200016](https://doi.org/10.1590/S1516-89132003000200016), 2003.
- 971 Saboya, P., and Borghetti, F.: Germination, initial growth, and biomass allocation in three  
972 native Cerrado species, *Braz. J. Bot.*, 35, 129–135, <https://doi.org/10.1590/S0100->  
973 [84042012000200002](https://doi.org/10.1590/S0100-84042012000200002), 2012.
- 974 Sakschewski, B., Von Bloh, W., Boit, A., Rammig, A., Kattge, J., Poorter, L., Peñuelas, J.,  
975 and Thonicke, K.: Leaf and stem economics spectra drive diversity of functional plant  
976 traits in a dynamic global vegetation model, *Glob. Change Biol.*, 21, 2711–2725,  
977 <https://doi.org/10.1111/gcb.12870>, 2015.
- 978 Sakschewski, B., von Bloh, W., Drüke, M., Sörensson, A. A., Ruscica, R., Langerwisch, F.,  
979 Billing, M., Bereswill, S., Hirota, M., Oliveira, R. S., Heinke, J., and Thonicke, K.:  
980 Variable tree rooting strategies are key for modelling the distribution, productivity and  
981 evapotranspiration of tropical evergreen forests. *Biogeosciences*, 18, 4091–4116,  
982 <https://doi.org/10.5194/bg-18-4091-2021>, 2021.
- 983 Salazar, A., Katzfey, J., Thatcher, M., Syktus, J., Wong, K., and McAlpine, C.:  
984 Deforestation changes land–atmosphere interactions across South American biomes,  
985 *Global Planet. Change*, 139, 97–108, <https://doi.org/10.1016/j.gloplacha.2016.01.004>,  
986 2016.
- 987 Sano, E. E., Rodrigues, A. A., Martins, E. S., Bettiol, G. M., Bustamante, M. M. C., Bezerra,  
988 A. S., Couto, A. F., Vasconcelos, V., Schüler, J., and Bolfe, E. L.: Cerrado ecoregions:  
989 A spatial framework to assess and prioritize Brazilian savanna environmental diversity  
990 for conservation, *J. Environ. Manage.*, 232, 818–828,  
991 <https://doi.org/10.1016/j.jenvman.2018.11.108>, 2019.
- 992 Schaphoff, S., Von Bloh, W., Rammig, A., Thonicke, K., Biemans, H., Forkel, M., Gerten,  
993 D., Heinke, J., Jägermeyr, J., Knauer, J., Langerwisch, F., Lucht, W., Müller, C.,  
994 Rolinski, S., and Waha, K.: LPJmL4 – a dynamic global vegetation model with managed  
995 land – Part 1: Model description. *Geosci. Model Dev.*, 11, 1343–1375,  
996 <https://doi.org/10.5194/gmd-11-1343-2018>, 2018.



- 1997 Scholz, F. G., Bucci, S. J., Goldstein, G., Meinzer, F. C., Franco, A. C., and Salazar, A.:  
1998 Plant- and stand-level variation in biophysical and physiological traits along tree density  
1999 gradients in the Cerrado, Braz. J. Plant Physiol., 20, 217–232,  
1000 <https://doi.org/10.1590/S1677-04202008000300006>, 2008.
- 1001 Schöler, J.: Áreas prioritárias para a restauração no Cerrado: aumentando os benefícios e  
1002 reduzindo os conflitos, Masters dissertation, Universidade de Brasília, 105 p. Available  
1003 at <http://repositorio.unb.br/handle/10482/39518>, 2020.
- 1004 Schöler, J., and Bustamante, M. M. C.: Spatial planning for restoration in Cerrado:  
1005 Balancing the trade-offs between conservation and agriculture, J. Appl. Ecol., 59, 2616–  
1006 2626, <https://doi.org/10.1111/1365-2664.14262>, 2022.
- 1007 Schumacher, V., Setzer, A., Saba, M. M. F., Naccarato, K. P., Mattos, E., and Justino, F.:  
1008 Characteristics of lightning-caused wildfires in central Brazil in relation to cloud-ground  
1009 and dry lightning. Agr. Forest Meteorol., 312, 108723,  
1010 <https://doi.org/10.1016/j.agrformet.2021.108723>, 2022.
- 1011 Shinozaki, K., Yoda, K., Hozumi, K., and Kira, T.: A quantitative analysis of plant form-  
1012 the Pipe Model Theory: II. Further evidence of the theory and its application in forest  
1013 ecology. Jpn. J. Ecol., 14, 133–139. [https://doi.org/10.18960/seitai.14.4\\_133](https://doi.org/10.18960/seitai.14.4_133), 1964.
- 1014 Simon, M. F., and Pennington, T.: Evidence for adaptation to fire regimes in the tropical  
1015 savannas of the Brazilian Cerrado, Int. J. Plant Sci., 173, 711–723,  
1016 <https://doi.org/10.1086/665973>, 2012.
- 1017 Solbrig, O. T., Medina, E., and Silva, J. F.: Biodiversity and savanna ecosystem processes:  
1018 A global perspective (Vol. 121). Springer, 1996.
- 1019 Souchie, F. F., Pinto, J. R. R., Lenza, E., Gomes, L., Maracahipes-Santos, L., and Silvério,  
1020 D. V.: Post-fire resprouting strategies of woody vegetation in the Brazilian savanna, Acta  
1021 Bot. Bras., 31, 260–266, <https://doi.org/10.1590/0102-33062016abb0376>, 2017.
- 1022 Souza, C. R. D., Coelho De Souza, F., Francoso, R. D., Maia, V. A., Pinto, J. R. R., Higuchi,  
1023 P., Silva, A. C., Prado Júnior, J. A. D., Farrapo, C. L., Lenza, E., Mews, H., Rocha, H.  
1024 L. L., Mota, S. L., Rodrigues, A. L. C., Silva-Sene, A. M. D., Moura, D. M., Araújo, F.  
1025 D. C., Oliveira, F. D., Gianasi, F. M., ... Santos, R. M. D.: Functional and structural



- 1026 attributes of Brazilian tropical and subtropical forests and savannas, *Forest Ecol. Manag.*,  
1027 558, 121811, <https://doi.org/10.1016/j.foreco.2024.121811>, 2024.
- 1028 Strassburg, B. B. N., Brooks, T., Feltran-Barbieri, R., Iribarrem, A., Crouzeilles, R., Loyola,  
1029 R., Latawiec, A. E., Oliveira Filho, F. J. B., Scaramuzza, C. A. de M., Scarano, F. R.,  
1030 Soares-Filho, B., and Balmford, A.: Moment of truth for the Cerrado hotspot, *Nat. Ecol.*  
1031 *Evol.*, 1, 1–3, <https://doi.org/10.1038/s41559-017-0099>, 2017.
- 1032 Swann, A. L. S., Longo, M., Knox, R. G., Lee, E., and Moorcroft, P. R.: Future deforestation  
1033 in the Amazon and consequences for South American climate, *Agr. Forest Meteorol.*,  
1034 214–215, 12–24, <https://doi.org/10.1016/j.agrformet.2015.07.006>, 2015.
- 1035 Syktus, J. I., and McAlpine, C. A.: More than carbon sequestration: Biophysical climate  
1036 benefits of restored savanna woodlands, *Sci. Rep-UK*, 6, 29194,  
1037 <https://doi.org/10.1038/srep29194>, 2016.
- 1038 Terra, M. C. N. S., Nunes, M. H., Souza, C. R., Ferreira, G. W. D., Prado-Junior, J. A. do,  
1039 Rezende, V. L., Maciel, R., Mantovani, V., Rodrigues, A., Morais, V. A., Scolforo, J. R.  
1040 S., and Mello, J. M.: The inverted forest: Aboveground and notably large belowground  
1041 carbon stocks and their drivers in Brazilian savannas, *Sci. Total Environ.*, 867, 161320,  
1042 <https://doi.org/10.1016/j.scitotenv.2022.161320>, 2023.
- 1043 Terra, M. D. C. N. S., Santos, R. M. D., Prado Júnior, J. A. D., De Mello, J. M., Scolforo,  
1044 J. R. S., Fontes, M. A. L., Schiavini, I., Dos Reis, A. A., Bueno, I. T., Magnago, L. F. S.,  
1045 and Ter Steege, H.: Water availability drives gradients of tree diversity, structure and  
1046 functional traits in the Atlantic–Cerrado–Caatinga transition, Brazil, *J. Plant Ecol.*, 11,  
1047 803–814, <https://doi.org/10.1093/jpe/rty017>, 2018.
- 1048 Thonicke, K., Billing, M., von Bloh, W., Sakschewski, B., Niinemets, Ü., Peñuelas, J.,  
1049 Cornelissen, J. H. C., Onoda, Y., van Bodegom, P., Schaepman, M. E., Schneider, F. D.,  
1050 and Walz, A.: Simulating functional diversity of European natural forests along climatic  
1051 gradients, *J Biogeogr.*, 47, 1069–1085, <https://doi.org/10.1111/jbi.13809>, 2020.
- 1052 Thonicke, K., Spessa, A., Prentice, I. C., Harrison, S. P., Dong, L., and Carmona-Moreno,  
1053 C.: The influence of vegetation, fire spread and fire behavior on biomass burning and





- 1054 trace gas emissions: Results from a process-based model, *Biogeosciences*, 7, 1991–2011,  
1055 <https://doi.org/10.5194/bg-7-1991-2010>, 2010.
- 1056 Tumber-Dávila, S. J., Schenk, H. J., Du, E., and Jackson, R. B.: Plant sizes and shapes above  
1057 and belowground and their interactions with climate, *New Phytol.*, 235, 1032–1056,  
1058 <https://doi.org/10.1111/nph.18031>, 2022.
- 1059 van der Werf, G. R., Randerson, J. T., Giglio, L., van Leeuwen, T. T., Chen, Y., Rogers, B.  
1060 M., Mu, M., van Marle, M. J. E., Morton, D. C., Collatz, G. J., Yokelson, R. J., and  
1061 Kasibhatla, P. S.: Global fire emissions estimates during 1997–2016, *Earth Syst. Sci.*  
1062 *Data*, 9, 697–720, <https://doi.org/10.5194/essd-9-697-2017>, 2017.
- 1063 Von Bloh, W., Schaphoff, S., Müller, C., Rolinski, S., Waha, K., and Zaehle, S.:  
1064 Implementing the nitrogen cycle into the dynamic global vegetation, hydrology, and crop  
1065 growth model LPJmL (version 5.0), *Geosci. Model Dev.*, 11, 2789–2812,  
1066 <https://doi.org/10.5194/gmd-11-2789-2018>, 2018.
- 1067 Whitley, R., Beringer, J., Hutley, L. B., Abramowitz, G., De Kauwe, M. G., Evans, B.,  
1068 Haverd, V., Li, L., Moore, C., Ryu, Y., Scheiter, S., Schymanski, S. J., Smith, B., Wang,  
1069 Y.-P., Williams, M., and Yu, Q.: Challenges and opportunities in land surface modelling  
1070 of savanna ecosystems, *Biogeosciences*, 14, 4711–4732, <https://doi.org/10.5194/bg-14-4711-2017>, 2017.
- 1072 Wirth, S. B., Braun, J., Heinke, J., Ostberg, S., Rolinski, S., Schaphoff, S., Stenzel, F., von  
1073 Bloh, W., Taube, F., and Müller, C.: Biological nitrogen fixation of natural and  
1074 agricultural vegetation simulated with LPJmL 5.7.9, *Geosci. Model Dev.*, 17, 7889–  
1075 7914, <https://doi.org/10.5194/gmd-17-7889-2024>, 2024.
- 1076 Wullschleger, S. D., Epstein, H. E., Box, E. O., Euskirchen, E. S., Goswami, S., Iversen, C.  
1077 M., Kattge, J., Norby, R. J., van Bodegom, P. M., and Xu, X.: Plant functional types in  
1078 Earth system models: Past experiences and future directions for application of dynamic  
1079 vegetation models in high-latitude ecosystems, *Ann. Bot-London*, 114, 1–16.  
1080 <https://doi.org/10.1093/aob/mcu077>, 2014.
- 1081 Zemp, D. C., Schleussner, C.-F., Barbosa, H. M. J., Hirota, M., Montade, V., Sampaio, G.,  
1082 Staal, A., Wang-Erlandsson, L., and Rammig, A.: Self-amplified Amazon forest loss due

<https://doi.org/10.5194/egusphere-2025-2225>

Preprint. Discussion started: 3 June 2025

© Author(s) 2025. CC BY 4.0 License.

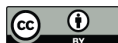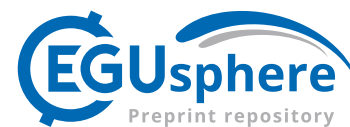

1083 to vegetation-atmosphere feedbacks, Nature Commun., 8, 14681,  
1084 <https://doi.org/10.1038/ncomms14681>, 2017.
